# Supplementary material for: Phylogenetic diversity and North Andean block conservation
Source: PeerJ journal article supplement (doi:10.7717/peerj.16565), 2023-12-06
Supplement: Supplementary_Table_S1.pdf [file Supplementary_Table_S1.pdf]

| Species                       | Branch Length        | Distribution |
|-------------------------------|----------------------|--------------|
| <i>Acalypha_platyphylla</i>   | 0.01058233           | Widespread   |
| <i>Acalypha_diversifolia</i>  | 3.90000000002888e-07 | Widespread   |
| <i>Acalypha_macrostachya</i>  | 0.006697             | Widespread   |
| <i>Acalypha_cuspidata</i>     | 0.00991001           | Widespread   |
| <i>Acalypha_wilkesiana</i>    | 5.1919999999997e-05  | Widespread   |
| <i>Acalypha_hispida</i>       | 0.00220306           | Widespread   |
| <i>Acalypha_schiedeana</i>    | 0.00284686           | Widespread   |
| <i>Acalypha_alopeuroidea</i>  | 0.00243688           | Widespread   |
| <i>Acalypha_ostryifolia</i>   | 1.0000000002876e-07  | Endemic      |
| <i>Acalypha_setosa</i>        | 2.9000000000012e-07  | Widespread   |
| <i>Anolis_huilae</i>          | 0.145122400000002    | Endemic      |
| <i>Anolis_fitchi</i>          | 0.151220500000001    | Widespread   |
| <i>Anolis_calimae</i>         | 0.173309930000002    | Endemic      |
| <i>Anolis_frenatus</i>        | 1.3000000098107e-06  | Widespread   |
| <i>Anolis_latifrons</i>       | 0.0186032199999993   | Widespread   |
| <i>Anolis_princeps</i>        | 0.0239916200000003   | Widespread   |
| <i>Anolis_maculigula</i>      | 0.09100866           | Widespread   |
| <i>Anolis_danieli</i>         | 0.100651859999999    | Widespread   |
| <i>Anolis_chocorum</i>        | 0.0855914800000015   | Widespread   |
| <i>Anolis_fraseri</i>         | 0.0996838500000017   | Widespread   |
| <i>Anolis_peraccaae</i>       | 0.1399215            | Widespread   |
| <i>Anolis_chloris</i>         | 1.3000000098107e-06  | Widespread   |
| <i>Anolis_ventrimaculatus</i> | 0.119918650000002    | Widespread   |
| <i>Anolis_aequatorialis</i>   | 0.0688228600000009   | Widespread   |
| <i>Anolis_anoriensis</i>      | 0.0746898199999997   | Endemic      |
| <i>Anolis_gemmosus</i>        | 0.0679977799999989   | Endemic      |
| <i>Anolis_jacare</i>          | 0.0428015299999984   | Widespread   |
| <i>Anolis_anatoloros</i>      | 0.0274928499999998   | Endemic      |
| <i>Anolis_punctatus</i>       | 0.127433710000002    | Widespread   |
| <i>Anolis_transversalis</i>   | 0.122802670000002    | Widespread   |
| <i>Anolis_heterodermus</i>    | 0.0224622400000003   | Widespread   |
| <i>Anolis_inderenae</i>       | 0.0465170600000029   | Endemic      |
| <i>Anolis_vanzolinii</i>      | 0.0193516100000011   | Endemic      |
| <i>Anolis_ortonii</i>         | 0.162928430000001    | Widespread   |
| <i>Anolis_tropidolepis</i>    | 0.0720300400000013   | Endemic      |
| <i>Anolis_humilis</i>         | 0.0583418999999985   | Endemic      |
| <i>Anolis_poecilopus</i>      | 0.0741838199999982   | Widespread   |
| <i>Anolis_tropidogaster</i>   | 0.0736687099999997   | Widespread   |
| <i>Anolis_trachyderma</i>     | 0.0871046            | Widespread   |
| <i>Anolis_fuscoauratus</i>    | 0.0388802200000029   | Widespread   |
| <i>Anolis_chrysolepis</i>     | 0.158657120000001    | Widespread   |
| <i>Anolis_bitectus</i>        | 0.104082600000002    | Widespread   |
| <i>Anolis_gracilipes</i>      | 0.13678359           | Widespread   |

|                                    |                      |            |
|------------------------------------|----------------------|------------|
| <i>Anolis_biporcatus</i>           | 0.14866726           | Widespread |
| <i>Anolis_scypheus</i>             | 0.10147456           | Widespread |
| <i>Anolis_bombiceps</i>            | 0.0582345399999973   | Endemic    |
| <i>Anolis_auratus</i>              | 0.186090570000001    | Widespread |
| <i>Aotus_lemurinus</i>             | 0.00242505000000001  | Widespread |
| <i>Aotus_griseimembra</i>          | 0.008560409999999999 | Endemic    |
| <i>Aotus_vociferans</i>            | 0.0200485            | Widespread |
| <i>Aotus_trivirgatus</i>           | 0.0183721            | Widespread |
| <i>Ara_ararauna</i>                | 0.00405641           | Widespread |
| <i>Ara_severus</i>                 | 0.0049336            | Widespread |
| <i>Ara_militaris</i>               | 0.00104014           | Widespread |
| <i>Ara_ambiguus</i>                | 0.00071864           | Widespread |
| <i>Ara_chloropterus</i>            | 0.00263039           | Widespread |
| <i>Ara_macao</i>                   | 0.00180194           | Widespread |
| <i>Amazona_festiva</i>             | 0.00294719           | Widespread |
| <i>Amazona_farinosa</i>            | 0.00346528           | Widespread |
| <i>Amazona_barbadensis</i>         | 0.00130522           | Widespread |
| <i>Amazona_ochrocephala</i>        | 0.000534659999999999 | Widespread |
| <i>Amazona_autumnalis</i>          | 0.00247624           | Widespread |
| <i>Amazona_amazonica</i>           | 0.000605410000000001 | Widespread |
| <i>Centurio_senex</i>              | 0.05442605           | Widespread |
| <i>Sphaeronycteris_toxophyllum</i> | 0.03757063           | Widespread |
| <i>Ametrida_centurio</i>           | 0.0266516            | Widespread |
| <i>Enchisthenes_hartii</i>         | 0.20945486           | Widespread |
| <i>Artibeus_concolor</i>           | 0.06945749           | Endemic    |
| <i>Artibeus_lituratus</i>          | 0.007223509999999999 | Widespread |
| <i>Artibeus_obscurus</i>           | 0.04774508           | Widespread |
| <i>Artibeus_planirostris</i>       | 0.02480912           | Widespread |
| <i>Artibeus_jamaicensis</i>        | 0.03997027           | Widespread |
| <i>Artibeus_fraterculus</i>        | 0.04031462           | Widespread |
| <i>Dermanura_glauca</i>            | 0.06718117           | Widespread |
| <i>Dermanura_bogotensis</i>        | 0.04112457           | Widespread |
| <i>Dermanura_cinerea</i>           | 0.07458572           | Widespread |
| <i>Dermanura_rosenbergi</i>        | 0.06416862           | Endemic    |
| <i>Dermanura_watsoni</i>           | 0.05376144           | Widespread |
| <i>Dermanura_phaeotis</i>          | 0.09830289           | Widespread |
| <i>Dermanura_tolteca</i>           | 0.04004407           | Widespread |
| <i>Dermanura_rava</i>              | 0.04589421           | Widespread |
| <i>Dermanura_anderseni</i>         | 0.04574688           | Widespread |
| <i>Alouatta_seniculus</i>          | 0.003798450000000001 | Widespread |
| <i>Alouatta_palliata</i>           | 0.01066338           | Widespread |
| <i>Ateles_belzebuth</i>            | 0.01608155           | Widespread |
| <i>Ateles_hybridus</i>             | 0.02153232           | Widespread |
| <i>Ateles_geoffroyi</i>            | 0.02069816           | Widespread |

|                              |                      |            |
|------------------------------|----------------------|------------|
| <i>Ateles_fusciceps</i>      | 0.01146733           | Widespread |
| <i>Lagothrix_lugens</i>      | 0.00152331           | Widespread |
| <i>Lagothrix_poepigii</i>    | 0.0054522499999999   | Endemic    |
| <i>Atractus_wagleri</i>      | 0.01893164           | Endemic    |
| <i>Atractus_schach</i>       | 0.02548019           | Endemic    |
| <i>Atractus_duboisii</i>     | 0.0176333            | Endemic    |
| <i>Atractus_resplendens</i>  | 0.01549281           | Endemic    |
| <i>Atractus_elaps</i>        | 0.03058121           | Widespread |
| <i>Atractus_major</i>        | 0.04241057           | Widespread |
| <i>Atractus_dunni</i>        | 0.00848931           | Endemic    |
| <i>Atractus_iridescens</i>   | 0.0056517600000001   | Widespread |
| <i>Atractus_badius</i>       | 0.04406756           | Endemic    |
| <i>Atractus_flammigerus</i>  | 0.02575977           | Widespread |
| <i>Bactris_schultesii</i>    | 0.0120944            | Endemic    |
| <i>Bactris_coloradonis</i>   | 0.00391791           | Widespread |
| <i>Bactris_concinna</i>      | 0.0040228599999999   | Endemic    |
| <i>Bactris_coloniata</i>     | 2.99199999999888e-05 | Widespread |
| <i>Bactris_guineensis</i>    | 2.1440000000114e-05  | Widespread |
| <i>Bactris_brongniartii</i>  | 0                    | Widespread |
| <i>Bactris_major</i>         | 7.8899999999929e-05  | Widespread |
| <i>Bactris_simplicifrons</i> | 0.08718455           | Widespread |
| <i>Bactris_setulosa</i>      | 0.09885101           | Widespread |
| <i>Bactris_maraja</i>        | 0.03471586           | Widespread |
| <i>Bactris_gasipaes</i>      | 0.01599592           | Widespread |
| <i>Bactris_barronis</i>      | 1.4000000009577e-07  | Widespread |
| <i>Marchantia_chenopoda</i>  | 0.0036662399999999   | Widespread |
| <i>Marchantia_polymorpha</i> | 0.0092917599999998   | Widespread |
| <i>Marchantia_paleacea</i>   | 0.0063001899999998   | Widespread |
| <i>Monoclea_forsteri</i>     | 0.0067658400000002   | Widespread |
| <i>Monoclea_gottschei</i>    | 0.01339617           | Widespread |
| <i>Bazzania_affinis</i>      | 0.02361725           | Widespread |
| <i>Bazzania_tricrenata</i>   | 0.0012336499999998   | Endemic    |
| <i>Bomarea_hieronymi</i>     | 0.0253711            | Widespread |
| <i>Bomarea_linifolia</i>     | 0.0103295299999999   | Widespread |
| <i>Bomarea_edulis</i>        | 0.0016514100000002   | Widespread |
| <i>Bomarea_densiflora</i>    | 1.9999999894729e-08  | Widespread |
| <i>Bomarea_nervosa</i>       | 8.2500000004295e-06  | Endemic    |
| <i>Bomarea_ovata</i>         | 0.0035495899999999   | Widespread |
| <i>Bomarea_purpurea</i>      | 1.401999999948e-05   | Widespread |
| <i>Bomarea_glaucescens</i>   | 4.8150000000246e-05  | Widespread |
| <i>Bomarea_dissitifolia</i>  | 8.400000000195e-07   | Endemic    |
| <i>Bomarea_perglabra</i>     | 6.9999999076439e-08  | Endemic    |
| <i>Bomarea_spissiflora</i>   | 0.00296056           | Endemic    |
| <i>Bomarea_angulata</i>      | 2.100999999988e-05   | Widespread |

|                                    |                      |            |
|------------------------------------|----------------------|------------|
| <i>Bomarea_uncifolia</i>           | 0.03315957           | Widespread |
| <i>Bomarea_crassifolia</i>         | 0.00371723000000002  | Widespread |
| <i>Bomarea_multiflora</i>          | 0.01055055           | Widespread |
| <i>Bomarea_hirsuta</i>             | 0.01530354           | Widespread |
| <i>Bomarea_diffRACTA</i>           | 0.00349382999999992  | Widespread |
| <i>Bomarea_patinii</i>             | 0.00801657999999994  | Widespread |
| <i>Bomarea_bredemeyerana</i>       | 0.01162382000000001  | Widespread |
| <i>Bomarea_acutifolia</i>          | 4.04999999992217e-06 | Widespread |
| <i>Bomarea_pardina</i>             | 0.00354840000000001  | Widespread |
| <i>Bomarea_patacocensis</i>        | 0.00876496000000004  | Widespread |
| <i>Bomarea_salsilla</i>            | 0.01662992           | Endemic    |
| <i>Bomarea_setacea</i>             | 0.00698544000000001  | Widespread |
| <i>Bomarea_pauciflora</i>          | 0.0936462            | Widespread |
| <i>Bomarea_caucana</i>             | 0.00495634           | Endemic    |
| <i>Bombus_excellens</i>            | 0.01505659           | Widespread |
| <i>Bombus_pullatus</i>             | 0.00355457999999997  | Widespread |
| <i>Bombus_transversalis</i>        | 0.00365771999999998  | Widespread |
| <i>Bombus_rubicundus</i>           | 0.01748119           | Widespread |
| <i>Bombus_funebris</i>             | 0.01570856           | Widespread |
| <i>Bombus_melaleucus</i>           | 0.00811919999999999  | Widespread |
| <i>Bombus_robustus</i>             | 0.00564949999999997  | Widespread |
| <i>Bombus_hortulanus</i>           | 0.00135552           | Widespread |
| <i>Caesalpinia_coriaria</i>        | 0.01331073           | Widespread |
| <i>Caesalpinia_pluviosa</i>        | 0.00523631000000002  | Widespread |
| <i>Caesalpinia_cassioides</i>      | 0.00262693000000003  | Widespread |
| <i>Caesalpinia_pulcherrima</i>     | 0.01469506999999999  | Widespread |
| <i>Caesalpinia_spinosa</i>         | 0.00844794000000004  | Widespread |
| <i>Caesalpinia_crista</i>          | 0.00750745999999991  | Widespread |
| <i>Caesalpinia_bonduc</i>          | 0.00521606000000008  | Widespread |
| <i>Calamagrostis_rupestris</i>     | 0.00167879999999998  | Endemic    |
| <i>Calamagrostis_rigida</i>        | 9.0000000081391e-08  | Widespread |
| <i>Calamagrostis_tarmensis</i>     | 6.39999999996199e-07 | Widespread |
| <i>Calceolaria_ericoides</i>       | 0.00647003000000002  | Widespread |
| <i>Calceolaria_comosa</i>          | 0.00173909000000005  | Endemic    |
| <i>Calceolaria_sericea</i>         | 0.00143285999999998  | Widespread |
| <i>Calceolaria_perfoliata</i>      | 0.00427993000000004  | Widespread |
| <i>Calceolaria_lanata</i>          | 0.00173967000000008  | Widespread |
| <i>Calceolaria_pavonii</i>         | 0.000872059999999841 | Endemic    |
| <i>Calceolaria_tripartita</i>      | 0.00837733000000007  | Widespread |
| <i>Calceolaria_chelidonioides</i>  | 0.00174045999999994  | Widespread |
| <i>Calceolaria_dichotoma</i>       | 0.01174302999999999  | Endemic    |
| <i>Calceolaria_pedunculata</i>     | 0.01013917           | Widespread |
| <i>Calceolaria_lehmanniana</i>     | 0.00723406999999998  | Widespread |
| <i>Calceolaria_helianthemoides</i> | 0.00143685999999987  | Endemic    |

|                                   |                      |            |
|-----------------------------------|----------------------|------------|
| <i>Calceolaria_lavandulifolia</i> | 0.00423597000000009  | Endemic    |
| <i>Calceolaria_purpurascens</i>   | 0.000881560000000059 | Widespread |
| <i>Calceolaria_dilatata</i>       | 1.30000000009289e-06 | Widespread |
| <i>Calceolaria_brachiata</i>      | 0.01734459           | Widespread |
| <i>Calceolaria_nivalis</i>        | 5.07000000005142e-06 | Widespread |
| <i>Calceolaria_fusca</i>          | 0.00328011999999989  | Endemic    |
| <i>Calceolaria_microbefaria</i>   | 0.00143249000000001  | Widespread |
| <i>Calceolaria_phaeotricha</i>    | 0.00377991999999994  | Endemic    |
| <i>Calceolaria_rosmarinifolia</i> | 0.00526526000000005  | Widespread |
| <i>Calceolaria_gossypina</i>      | 1.30000000009289e-06 | Widespread |
| <i>Calceolaria_martinezii</i>     | 0.00262958000000002  | Widespread |
| <i>Calceolaria_spruceana</i>      | 0.00349796999999996  | Widespread |
| <i>Calceolaria_lamiifolia</i>     | 1.2999999987085e-06  | Widespread |
| <i>Calceolaria_penlandii</i>      | 1.2999999987085e-06  | Widespread |
| <i>Caligo_idomeneus</i>           | 0.02480297           | Widespread |
| <i>Caligo_atreus</i>              | 0.01442915           | Widespread |
| <i>Caligo_eurilochus</i>          | 0.00977135999999999  | Widespread |
| <i>Caligo_illioneus</i>           | 0.01986481           | Widespread |
| <i>Caligo_teucer</i>              | 0.09691979           | Widespread |
| <i>Caligo_oedipus</i>             | 0.01156411           | Widespread |
| <i>Caligo_brasiliensis</i>        | 0.00136174           | Widespread |
| <i>Caligo_telamonius</i>          | 0.00519059999999999  | Endemic    |
| <i>Speothos_venaticus</i>         | 0.0603245            | Widespread |
| <i>Atelocynus_microtis</i>        | 0.01259600000000001  | Endemic    |
| <i>Lycalopex_culpaeus</i>         | 0.00564083000000004  | Endemic    |
| <i>Lycalopex_griseus</i>          | 0.00395999999999996  | Endemic    |
| <i>Cerdocyon_thous</i>            | 0.04602633           | Widespread |
| <i>Urocyon_cinereoargenteus</i>   | 0.07764924           | Widespread |
| <i>Canthon_subhyalinus</i>        | 0.01216895           | Widespread |
| <i>Canthon_luteicollis</i>        | 0.01608696           | Widespread |
| <i>Canthon_aequinoctialis</i>     | 0.01475962           | Widespread |
| <i>Canthon_quinquemaculatus</i>   | 0.01818762           | Widespread |
| <i>Canthon_cyanellus</i>          | 0.0093647            | Widespread |
| <i>Eubucco_bourcierii</i>         | 0.14074853           | Widespread |
| <i>Capito_aurovirens</i>          | 0.1249901            | Widespread |
| <i>Capito_quinticolor</i>         | 0.10919064           | Widespread |
| <i>Eubucco_richardsoni</i>        | 0.09096416           | Widespread |
| <i>Capito_maculicoronatus</i>     | 0.01275332           | Widespread |
| <i>Capito_squamatus</i>           | 0.01337389           | Widespread |
| <i>Capito_auratus</i>             | 0.01796758           | Widespread |
| <i>Capito_niger</i>               | 0.15363067           | Widespread |
| <i>Catasticta_semiramis</i>       | 0.07125222           | Widespread |
| <i>Catasticta_sisamnus</i>        | 0.05272879           | Endemic    |
| <i>Cathartes_aura</i>             | 0.02259692           | Widespread |

|                                  |                      |            |
|----------------------------------|----------------------|------------|
| <i>Cathartes_burrovianus</i>     | 0.02273002           | Widespread |
| <i>Cathartes_melambrotus</i>     | 0.03421128           | Widespread |
| <i>Sarcoramphus_papa</i>         | 0.07136998           | Widespread |
| <i>Vultur_gryphus</i>            | 0.04386813           | Widespread |
| <i>Cebus_olivaceus</i>           | 0.0179334            | Widespread |
| <i>Cebus_capucinus</i>           | 0.04358278           | Widespread |
| <i>Cebus_albifrons</i>           | 0.02617102           | Widespread |
| <i>Cebus_apella</i>              | 0.01329163           | Widespread |
| <i>Saimiri_sciureus</i>          | 0.01540989           | Widespread |
| <i>Ceroxylon_alpinum</i>         | 0.00221652           | Widespread |
| <i>Ceroxylon_sasaimae</i>        | 0.00082169           | Endemic    |
| <i>Ceroxylon_echinulatum</i>     | 0.00027438           | Widespread |
| <i>Ceroxylon_amazonicum</i>      | 0.00027578           | Endemic    |
| <i>Ceroxylon_parvifrons</i>      | 0.00082391           | Widespread |
| <i>Ceroxylon_ventricosum</i>     | 0.00055208           | Widespread |
| <i>Ceroxylon_quindiense</i>      | 0.00027542           | Widespread |
| <i>Ceroxylon_ceriferum</i>       | 0.00110764           | Widespread |
| <i>Ceroxylon_vogelianum</i>      | 0.00028499           | Widespread |
| <i>Chiroderma_salvini</i>        | 0.00891815           | Widespread |
| <i>Chiroderma_trinitatum</i>     | 0.00347192           | Widespread |
| <i>Chiroderma_villosum</i>       | 0.00463559           | Widespread |
| <i>Chironius_grandisquamis</i>   | 0.08016316           | Widespread |
| <i>Chironius_scurrulus</i>       | 0.04352418           | Widespread |
| <i>Chironius_fuscus</i>          | 0.0789436600000001   | Widespread |
| <i>Chironius_monticola</i>       | 0.04945395           | Widespread |
| <i>Chironius_exoletus</i>        | 0.06133661           | Widespread |
| <i>Chironius_carinatus</i>       | 0.0308847800000001   | Widespread |
| <i>Chlorochrysa_phoenicotis</i>  | 0.04933517           | Widespread |
| <i>Chlorochrysa_nitidissima</i>  | 0.02957902           | Widespread |
| <i>Chlorochrysa_calliparaea</i>  | 0.02457216           | Widespread |
| <i>Cissopis_leverianus</i>       | 0.05469743           | Widespread |
| <i>Schistochlamys_melanopis</i>  | 0.03920459           | Widespread |
| <i>Paroaria_coronata</i>         | 0.03249906           | Endemic    |
| <i>Paroaria_gularis</i>          | 0.01229052           | Widespread |
| <i>Christensonella_uncata</i>    | 0.01790415           | Widespread |
| <i>Christensonella_nardoides</i> | 0.01290546           | Endemic    |
| <i>Chusquea_uniflora</i>         | 2.34000000887136e-06 | Widespread |
| <i>Chusquea_albilanata</i>       | 0.000259670000005485 | Widespread |
| <i>Chusquea_subulata</i>         | 3.07999999904496e-06 | Widespread |
| <i>Chusquea_exasperata</i>       | 0.000799929999999449 | Endemic    |
| <i>Chusquea_maclurei</i>         | 0.0014350000000074   | Widespread |
| <i>Chusquea_fendleri</i>         | 0.0016563000000076   | Widespread |
| <i>Chusquea_purdieana</i>        | 1.07999998988362e-06 | Widespread |
| <i>Chusquea_serpens</i>          | 0.000990959999995766 | Widespread |

|                               |                      |            |
|-------------------------------|----------------------|------------|
| <i>Chusquea_maculata</i>      | 0.00170952000000568  | Widespread |
| <i>Chusquea_latifolia</i>     | 0.00543510999999341  | Widespread |
| <i>Chusquea_spencei</i>       | 0.00201778999999647  | Widespread |
| <i>Chusquea_perligulata</i>   | 0.00101302000000203  | Endemic    |
| <i>Chusquea_robusta</i>       | 0.00104196000000911  | Endemic    |
| <i>Chusquea_antioquiensis</i> | 0.0014405100000009   | Widespread |
| <i>Chusquea_lehmannii</i>     | 0.000648580000003562 | Widespread |
| <i>Chusquea_subtessellata</i> | 0.00064806000000317  | Widespread |
| <i>Chusquea_scandens</i>      | 0.000836290000009399 | Widespread |
| <i>Chusquea_tessellata</i>    | 0.00031173000000706  | Widespread |
| <i>Chusquea_arachniformis</i> | 0.00236900999999534  | Endemic    |
| <i>Chusquea_spectabilis</i>   | 0.00787483999999949  | Widespread |
| <i>Chusquea_magnifolia</i>    | 0.00045624999999159  | Endemic    |
| <i>Chusquea_stuebelii</i>     | 0.000820399999994947 | Widespread |
| <i>Chusquea_asymmetrica</i>   | 0.00172507999999993  | Endemic    |
| <i>Chusquea_villosa</i>       | 0.000856330000004846 | Endemic    |
| <i>Chusquea_rigida</i>        | 0.000838049999998702 | Endemic    |
| <i>Chusquea_aristata</i>      | 0.00598919000000819  | Widespread |
| <i>Chusquea_elata</i>         | 0.000183840000005375 | Widespread |
| <i>Chusquea_nana</i>          | 0.0030354400000005   | Endemic    |
| <i>Chusquea_nobilis</i>       | 0.000836919999997576 | Widespread |
| <i>Mycteria_americana</i>     | 0.02041501           | Widespread |
| <i>Ciconia_maguari</i>        | 0.04834408           | Widespread |
| <i>Columnea_rosea</i>         | 0.01578853           | Widespread |
| <i>Columnea_dielsii</i>       | 0.01308844           | Widespread |
| <i>Columnea_picta</i>         | 0.00981809           | Widespread |
| <i>Columnea_medicinalis</i>   | 0.02507893           | Widespread |
| <i>Columnea_eburnea</i>       | 0.00467469           | Widespread |
| <i>Columnea_schimpffii</i>    | 0.00480996           | Widespread |
| <i>Columnea_albiflora</i>     | 0.00256153000000001  | Widespread |
| <i>Columnea_villosissima</i>  | 4.29999999995712e-07 | Widespread |
| <i>Columnea_ericae</i>        | 0.00208456           | Widespread |
| <i>Columnea_guttata</i>       | 0.00485073999999999  | Widespread |
| <i>Columnea_inaequilatera</i> | 2.8200000000006e-06  | Widespread |
| <i>Columnea_tenella</i>       | 0.01620723           | Widespread |
| <i>Columnea_atahualpae</i>    | 0.00190712000000001  | Endemic    |
| <i>Columnea_isernii</i>       | 0.00132649           | Widespread |
| <i>Columnea_lophophora</i>    | 0.00142848999999999  | Endemic    |
| <i>Columnea_gloriosa</i>      | 0.01432269           | Widespread |
| <i>Columnea_eubracteata</i>   | 0.00401419           | Widespread |
| <i>Columnea_manabiana</i>     | 0.01112263           | Widespread |
| <i>Columnea_tandapiana</i>    | 0.05353195           | Widespread |
| <i>Columnea_dressleri</i>     | 0.00128693000000001  | Endemic    |
| <i>Columnea_moesta</i>        | 0.00480016           | Endemic    |

|                                 |                       |            |
|---------------------------------|-----------------------|------------|
| <i>Columnea_paramicola</i>      | 0.006887129999999999  | Endemic    |
| <i>Columnea_tenensis</i>        | 0.000761949999999997  | Widespread |
| <i>Columnea_brenneri</i>        | 0.00400006            | Widespread |
| <i>Columnea_elongatifolia</i>   | 8.60000000005301e-07  | Widespread |
| <i>Columnea_crassicaulis</i>    | 0.006014689999999999  | Endemic    |
| <i>Columnea_katzensteiniae</i>  | 0.00444561            | Widespread |
| <i>Columnea_rileyi</i>          | 0.00875073            | Widespread |
| <i>Columnea_lehmannii</i>       | 8.60000000005301e-07  | Widespread |
| <i>Columnea_spathulata</i>      | 0.00675942            | Widespread |
| <i>Columnea_angustata</i>       | 0.00147543            | Widespread |
| <i>Columnea_nicaraguensis</i>   | 0.00103613000000001   | Widespread |
| <i>Columnea_orientandina</i>    | 0.005322129999999999  | Widespread |
| <i>Columnea_ovatifolia</i>      | 0.00594759            | Widespread |
| <i>Columnea_colombiana</i>      | 0.00380312000000001   | Widespread |
| <i>Columnea_kalbreyeriana</i>   | 0.03046348            | Widespread |
| <i>Columnea_byrsina</i>         | 0.01596716            | Widespread |
| <i>Columnea_minor</i>           | 0.00444751            | Widespread |
| <i>Columnea_scandens</i>        | 0.00668778            | Widespread |
| <i>Columnea_billbergiana</i>    | 0.000905600000000006  | Widespread |
| <i>Columnea_bilabiata</i>       | 0.00292269000000001   | Widespread |
| <i>Columnea_ciliata</i>         | 0.003415129999999999  | Widespread |
| <i>Columnea_purpurata</i>       | 8.5999999991423e-07   | Widespread |
| <i>Columnea_purpureovittata</i> | 0.00488330000000001   | Endemic    |
| <i>Columnea_dissimilis</i>      | 0.007859739999999999  | Widespread |
| <i>Columnea_fimbricalyx</i>     | 0.00456508            | Widespread |
| <i>Columnea_rubriacuta</i>      | 0.01014673            | Widespread |
| <i>Columnea_rubricalyx</i>      | 0.0126198             | Widespread |
| <i>Columnea_minutiflora</i>     | 0.009714599999999999  | Widespread |
| <i>Columnea_herthae</i>         | 0.007578249999999999  | Widespread |
| <i>Columnea_consanguinea</i>    | 0.01244609            | Widespread |
| <i>Columnea_sanguinea</i>       | 0.00408828            | Widespread |
| <i>Columnea_filifera</i>        | 0.00338053000000001   | Widespread |
| <i>Columnea_citriflora</i>      | 0.00533411            | Endemic    |
| <i>Columnea_anisophylla</i>     | 0.00763905000000001   | Widespread |
| <i>Columnea_calotricha</i>      | 0.004617299999999999  | Widespread |
| <i>Columnea_mira</i>            | 0.004191129999999999  | Endemic    |
| <i>Columnea_strigosa</i>        | 0.00838053            | Widespread |
| <i>Columnea_kucyniakii</i>      | 0.01136055            | Widespread |
| <i>Cyathea_parvula</i>          | 0.00627724            | Widespread |
| <i>Cyathea_poeppigii</i>        | 0.00210372            | Widespread |
| <i>Cyathea_tryonorum</i>        | 0.00246986            | Widespread |
| <i>Cyathea_bicrenata</i>        | 1.02900000001e-05     | Widespread |
| <i>Cyathea_karsteniana</i>      | 0.0007593899999999999 | Endemic    |
| <i>Cyathea_horrida</i>          | 0.000479979999999991  | Widespread |



|                                  |                       |            |
|----------------------------------|-----------------------|------------|
| <i>Cyathea_mutica</i>            | 0.000854450000000007  | Widespread |
| <i>Cyathea_microdonta</i>        | 0.002094640000000001  | Widespread |
| <i>Cyathea_gibbosa</i>           | 0.00112722            | Endemic    |
| <i>Cyathea_senilis</i>           | 1.20000000006226e-07  | Widespread |
| <i>Cyathea_pungens</i>           | 0.004212500000000001  | Widespread |
| <i>Cyathea_andina</i>            | 0.001120109999999999  | Widespread |
| <i>Cyathea_nigripes</i>          | 0.001137590000000001  | Widespread |
| <i>Cyathea_lasiosora</i>         | 0.001144520000000001  | Widespread |
| <i>Cyathea_petiolata</i>         | 0.00155682            | Widespread |
| <i>Cyathea_multiflora</i>        | 0.0002614699999999986 | Widespread |
| <i>Cyathea_suprastrigosa</i>     | 0.00106963            | Widespread |
| <i>Cyathea_planadae</i>          | 0.001751780000000001  | Widespread |
| <i>Cyathea_guentheriana</i>      | 0.001462109999999999  | Endemic    |
| <i>Cyathea_schiedeana</i>        | 0.0001331699999999988 | Widespread |
| <i>Cyathea_mucilagina</i>        | 0.0001619199999999996 | Widespread |
| <i>Cyathea_gracilis</i>          | 9.70000000000137e-06  | Widespread |
| <i>Cyathea_caracasana</i>        | 0.0003302599999999999 | Widespread |
| <i>Cyathea_fulva</i>             | 0.0008329499999999999 | Widespread |
| <i>Cyathea_divergens</i>         | 1.40000000009577e-07  | Widespread |
| <i>Deltochilum_carinatum</i>     | 0.07217439            | Widespread |
| <i>Deltochilum_mexicanum</i>     | 0.02616402            | Widespread |
| <i>Deltochilum_gibbosum</i>      | 0.04137776            | Widespread |
| <i>Colostethus_pratti</i>        | 0.0685966             | Widespread |
| <i>Colostethus_panamansis</i>    | 0.07020156            | Endemic    |
| <i>Ameerega_bilinguis</i>        | 0.05643972            | Endemic    |
| <i>Ameerega_parvula</i>          | 0.05058986999999999   | Widespread |
| <i>Colostethus_fraterdanieli</i> | 0.11584806            | Widespread |
| <i>Epipedobates_boulengeri</i>   | 0.0203202             | Widespread |
| <i>Epipedobates_machalilla</i>   | 0.01653794            | Widespread |
| <i>Hyloxalus vertebralis</i>     | 0.13377864            | Widespread |
| <i>Hyloxalus_maculosus</i>       | 0.006606229999999994  | Endemic    |
| <i>Hyloxalus_bocagei</i>         | 0.04112619000000001   | Widespread |
| <i>Hyloxalus_sauli</i>           | 0.0695938             | Widespread |
| <i>Hyloxalus_elachyhistus</i>    | 0.10089247            | Endemic    |
| <i>Hyloxalus_toachi</i>          | 0.02419271            | Endemic    |
| <i>Hyloxalus_awa</i>             | 0.01494949            | Widespread |
| <i>Hyloxalus_subpunctatus</i>    | 0.11831504            | Widespread |
| <i>Hyloxalus_delatorrae</i>      | 0.14944585            | Widespread |
| <i>Phyllobates_aurotaenia</i>    | 0.03042819000000001   | Widespread |
| <i>Phyllobates_terribilis</i>    | 0.03507321            | Endemic    |
| <i>Andinobates_minutus</i>       | 0.07072638999999999   | Widespread |
| <i>Andinobates_fulguritus</i>    | 0.07371558            | Widespread |
| <i>Oophaga_lehmanni</i>          | 0.02651092            | Endemic    |
| <i>Dendrobates_truncatus</i>     | 0.05105717999999999   | Widespread |

|                                     |                     |            |
|-------------------------------------|---------------------|------------|
| <i>Dendrobates_auratus</i>          | 0.0934037           | Widespread |
| <i>Adelphobates_quinquevittatus</i> | 0.0876288200000001  | Widespread |
| <i>Phyllobates_bicolor</i>          | 0.2617491           | Widespread |
| <i>Ameerega_hahneli</i>             | 0.11525649          | Widespread |
| <i>Epipedobates_tricolor</i>        | 0.0942432           | Endemic    |
| <i>Andinobates_bombetes</i>         | 0.00912060999999997 | Widespread |
| <i>Andinobates_virolinensis</i>     | 0.00575048          | Endemic    |
| <i>Andinobates_cassidyhornae</i>    | 0.01307657          | Endemic    |
| <i>Andinobates_opisthomelas</i>     | 0.0144966600000001  | Widespread |
| <i>Ranitomeya_ventrimaculata</i>    | 0.0371323600000001  | Widespread |
| <i>Oophaga_histrionica</i>          | 0.01427832          | Widespread |
| <i>Veniliornis_fumigatus</i>        | 0.0318924           | Widespread |
| <i>Veniliornis_kirkii</i>           | 0.04201002          | Widespread |
| <i>Veniliornis_passerinus</i>       | 0.00214611          | Widespread |
| <i>Veniliornis_frontalis</i>        | 0.00264861          | Endemic    |
| <i>Veniliornis_chocoensis</i>       | 52.18454493         | Widespread |
| <i>Veniliornis_callonotus</i>       | 0.01646037          | Widespread |
| <i>Veniliornis_dignus</i>           | 0.02143528          | Widespread |
| <i>Veniliornis_nigriceps</i>        | 0.02427113          | Widespread |
| <i>Veniliornis_affinis</i>          | 0.02928182          | Widespread |
| <i>Sphyrapicus_varius</i>           | 0.01653307          | Widespread |
| <i>Melanerpes_formicivorus</i>      | 0.05313465          | Widespread |
| <i>Melanerpes_pucherani</i>         | 0.05341367          | Widespread |
| <i>Diphylla_ecaadata</i>            | 0.08597274          | Widespread |
| <i>Desmodus_rotundus</i>            | 0.04312338          | Widespread |
| <i>Diaemus_youngi</i>               | 0.12975758          | Endemic    |
| <i>Caluromys_philander</i>          | 0.05190029          | Endemic    |
| <i>Caluromys_derbianus</i>          | 0.06054236          | Widespread |
| <i>Caluromys_lanatus</i>            | 0.04379881          | Widespread |
| <i>Marmosa_rubra</i>                | 0.18215873          | Widespread |
| <i>Marmosa_xerophila</i>            | 0.04892872          | Widespread |
| <i>Marmosa_robinsoni</i>            | 0.05504831          | Widespread |
| <i>Marmosa_mexicana</i>             | 0.08129581          | Endemic    |
| <i>Marmosa_lepida</i>               | 0.08243072          | Endemic    |
| <i>Marmosa_murina</i>               | 0.04538912          | Widespread |
| <i>Micoureus_alstoni</i>            | 0.07802015          | Endemic    |
| <i>Micoureus_demerarae</i>          | 0.03635604          | Widespread |
| <i>Micoureus_regina</i>             | 0.02224152          | Widespread |
| <i>Monodelphis_palliolata</i>       | 0.024969            | Widespread |
| <i>Metachirus_nudicaudatus</i>      | 0.19506084          | Widespread |
| <i>Chironectes_minimus</i>          | 0.08278057          | Widespread |
| <i>Philander_frenatus</i>           | 0.0610229           | Widespread |
| <i>Didelphis_virginiana</i>         | 0.06943673          | Endemic    |
| <i>Didelphis_albiventris</i>        | 0.01592479          | Widespread |

|                                   |                       |            |
|-----------------------------------|-----------------------|------------|
| <i>Didelphis_imperfecta</i>       | 0.02597232            | Widespread |
| <i>Didelphis_marsupialis</i>      | 0.01665572            | Widespread |
| <i>Philander_andersoni</i>        | 0.03671132            | Widespread |
| <i>Philander_opossum</i>          | 0.02395776            | Widespread |
| <i>Gracilinanus_marica</i>        | 0.07465685            | Endemic    |
| <i>Gracilinanus_agilis</i>        | 0.05994844            | Endemic    |
| <i>Marmosops_impavidus</i>        | 0.01859951            | Widespread |
| <i>Marmosops_noctivagus</i>       | 0.0372628699999999    | Widespread |
| <i>Marmosops_parvidens</i>        | 0.0257183             | Widespread |
| <i>Marmosops_handleyi</i>         | 0.07378721            | Endemic    |
| <i>Marmosops_invictus</i>         | 0.09376184            | Endemic    |
| <i>Marmosops_fuscatus</i>         | 0.0371403100000001    | Widespread |
| <i>Diplazium_plantaginifolium</i> | 0.00844161            | Widespread |
| <i>Diplazium_bombonasae</i>       | 0.00786836            | Widespread |
| <i>Diplazium_unilobum</i>         | 0.00564502            | Endemic    |
| <i>Diplazium_cristatum</i>        | 0.00197913            | Widespread |
| <i>Diplazium_expansum</i>         | 0.00181255            | Widespread |
| <i>Diplazium_megaphyllum</i>      | 0.00270088            | Endemic    |
| <i>Diplazium_pinnatifidum</i>     | 0.0028441             | Widespread |
| <i>Diplazium_lindbergii</i>       | 0.00243906000000001   | Widespread |
| <i>Diplazium_striatum</i>         | 0.00415098000000001   | Widespread |
| <i>Diplazium_remotum</i>          | 0.00111421            | Widespread |
| <i>Diplazium_macrophyllum</i>     | 3.699999999999537e-07 | Widespread |
| <i>Diplazium_bicolor</i>          | 0.002218389999999999  | Endemic    |
| <i>Diplazium_cuneifolium</i>      | 0.00326073            | Endemic    |
| <i>Diplazium_diplazioides</i>     | 1.17199999999928e-05  | Widespread |
| <i>Diplazium_grandifolium</i>     | 0.01133912            | Widespread |
| <i>Diplazium_divergens</i>        | 0.00114537000000001   | Endemic    |
| <i>Diplazium_hians</i>            | 0.00145766            | Widespread |
| <i>Diplazium_centripetale</i>     | 0.004022249999999999  | Endemic    |
| <i>Diplazium_subserratum</i>      | 0.00533831            | Widespread |
| <i>Dipsas_indica</i>              | 0.035249              | Widespread |
| <i>Ninia_atrata</i>               | 0.0456551             | Widespread |
| <i>Sibon_nebulatus</i>            | 0.01616738            | Widespread |
| <i>Dipsas_articulata</i>          | 0.00459972            | Widespread |
| <i>Dipsas_catesbyi</i>            | 0.06325504            | Widespread |
| <i>Dipsas_variegata</i>           | 0.00181952            | Widespread |
| <i>Dipsas_pratti</i>              | 0.00041973            | Widespread |
| <i>Sigesbeckia_jorullensis</i>    | 0.02270386            | Widespread |
| <i>Sigesbeckia_orientalis</i>     | 1.59999999999905e-06  | Endemic    |
| <i>Smallanthus_pyramidalis</i>    | 0.00991912            | Widespread |
| <i>Smallanthus_microcephalus</i>  | 0.009359349999999999  | Widespread |
| <i>Smallanthus_riparius</i>       | 1.31000000000436e-06  | Widespread |
| <i>Smallanthus_siegesbeckius</i>  | 0.005010789999999999  | Endemic    |

|                                       |                      |            |
|---------------------------------------|----------------------|------------|
| <i>Smallanthus_fruticosus</i>         | 1.0420000000011e-05  | Widespread |
| <i>Libanothamnus_occultus</i>         | 0.0244754            | Widespread |
| <i>Carramboa_trujillensis</i>         | 0.03715956           | Endemic    |
| <i>Coespeletia_timotensis</i>         | 0.00945135           | Endemic    |
| <i>Espeletiopsis_pannosa</i>          | 1.31000000000436e-06 | Endemic    |
| <i>Ruilopezia_ruizii</i>              | 0.01764959           | Endemic    |
| <i>Ruilopezia_marcescens</i>          | 0.00241916           | Widespread |
| <i>Ruilopezia_atropurpurea</i>        | 0.00757695           | Endemic    |
| <i>Tamania_chardonii</i>              | 0.02010066           | Widespread |
| <i>Espeletia_schultzii</i>            | 5.25000000001219e-06 | Endemic    |
| <i>Coespeletia_moritziana</i>         | 0.00990958           | Endemic    |
| <i>Espeletia_pycnophylla</i>          | 0.00494057000000001  | Widespread |
| <i>Espeletiopsis_jimenez-quesadae</i> | 5.25000000001219e-06 | Widespread |
| <i>Paramiflos_glandulosus</i>         | 0.00246732999999999  | Endemic    |
| <i>Ichthyothere_scandens</i>          | 0.07342266           | Widespread |
| <i>Ichthyothere_terminalis</i>        | 0                    | Widespread |
| <i>Eulaema_sororia</i>                | 0.01441385           | Endemic    |
| <i>Eulaema_bombiformis</i>            | 0.00572847999999998  | Endemic    |
| <i>Eulaema_meriana</i>                | 0.00164631999999998  | Widespread |
| <i>Eulaema_speciosa</i>               | 0.23636622           | Endemic    |
| <i>Eulaema_polychroma</i>             | 0.02378798           | Widespread |
| <i>Eulaema_boliviensis</i>            | 0.00603517999999997  | Endemic    |
| <i>Eulaema_pseudocingulata</i>        | 9.9999999973245e-07  | Endemic    |
| <i>Eulaema_cingulata</i>              | 9.9999999973245e-07  | Widespread |
| <i>Eulaema_nigrita</i>                | 0.01110649           | Widespread |
| <i>Exaerete_smaragdina</i>            | 0.01830557           | Endemic    |
| <i>Exaerete_frontalis</i>             | 0.02644544           | Endemic    |
| <i>Euglossa_tridentata</i>            | 0.01794104           | Widespread |
| <i>Euglossa_cognata</i>               | 0.01008035           | Endemic    |
| <i>Euglossa_mixta</i>                 | 0.02544611           | Widespread |
| <i>Euglossa_maculilabris</i>          | 0.01815408           | Widespread |
| <i>Euglossa_cybelia</i>               | 0.01494867           | Widespread |
| <i>Euglossa_hemichlora</i>            | 0.0104276            | Endemic    |
| <i>Euglossa_cordata</i>               | 0.00613493999999998  | Endemic    |
| <i>Euglossa_chlorina</i>              | 0.00593071000000001  | Endemic    |
| <i>Euglossa_deceptrix</i>             | 0.00598568999999999  | Widespread |
| <i>Euglossa_variabilis</i>            | 0.01052508           | Endemic    |
| <i>Euglossa_despecta</i>              | 0.00351340999999999  | Endemic    |
| <i>Euglossa_modestior</i>             | 0.01827516           | Endemic    |
| <i>Euglossa_townsendi</i>             | 0.02114823           | Endemic    |
| <i>Euglossa_amazonica</i>             | 0.00263273000000003  | Widespread |
| <i>Euglossa_heterosticta</i>          | 0.00734516000000002  | Endemic    |
| <i>Euglossa_hansoni</i>               | 0.0119854            | Endemic    |
| <i>Euglossa_macrorhyncha</i>          | 0.01183596           | Widespread |

|                                 |                       |            |
|---------------------------------|-----------------------|------------|
| <i>Euglossa_turbifex</i>        | 0.01313105            | Endemic    |
| <i>Euglossa_allosticta</i>      | 0.03056453            | Widespread |
| <i>Euglossa_ignita</i>          | 0.01158231            | Endemic    |
| <i>Euglossa_orellana</i>        | 0.0083879             | Widespread |
| <i>Euglossa_fuscifrons</i>      | 0.01540648            | Endemic    |
| <i>Euglossa_samperi</i>         | 0.01641499            | Widespread |
| <i>Eufriesea_pulchra</i>        | 0.008969              | Endemic    |
| <i>Eufriesea_lucifera</i>       | 0.02416434            | Endemic    |
| <i>Eufriesea_surinamensis</i>   | 0.01357377            | Endemic    |
| <i>Eufriesea_chrysopyga</i>     | 0.01137105            | Endemic    |
| <i>Eufriesea_magrettii</i>      | 0.01060753            | Endemic    |
| <i>Falco_sparverius</i>         | 0.03944703            | Widespread |
| <i>Falco_columbarius</i>        | 0.01436407            | Widespread |
| <i>Falco_deiroleucus</i>        | 0.007928260000000001  | Widespread |
| <i>Falco_femoralis</i>          | 0.009129670000000001  | Widespread |
| <i>Falco_peregrinus</i>         | 0.005317390000000001  | Widespread |
| <i>Falco_ruficularis</i>        | 0.0007424799999999999 | Widespread |
| <i>Panthera_onca</i>            | 0.00177908            | Widespread |
| <i>Puma_concolor</i>            | 0.00178741            | Widespread |
| <i>Puma_yagouaroundi</i>        | 0.00228621            | Widespread |
| <i>Leopardus_colocolo</i>       | 0.0008036799999999999 | Endemic    |
| <i>Leopardus_tigrinus</i>       | 0.0005890099999999999 | Widespread |
| <i>Leopardus_wiedii</i>         | 0.00117308            | Widespread |
| <i>Leopardus_pardalis</i>       | 0.0032398             | Widespread |
| <i>Fregata_magnificens</i>      | 3.97000000001979e-06  | Widespread |
| <i>Geonoma_deversa</i>          | 0.00112527            | Widespread |
| <i>Geonoma_interrupta</i>       | 0.0008236             | Widespread |
| <i>Geonoma_pinnatifrons</i>     | 0.00032201            | Widespread |
| <i>Geonoma_frontinensis</i>     | 0.0021578             | Widespread |
| <i>Geonoma_poepigiana</i>       | 0.00208436            | Endemic    |
| <i>Geonoma_brongniartii</i>     | 0.00094585            | Widespread |
| <i>Geonoma_longepedunculata</i> | 0.00285594            | Widespread |
| <i>Geonoma_hollinensis</i>      | 0.00213573            | Widespread |
| <i>Geonoma_divisa</i>           | 0.00272581            | Widespread |
| <i>Geonoma_triandra</i>         | 0.00146369            | Widespread |
| <i>Geonoma_ferruginea</i>       | 0.00018591            | Endemic    |
| <i>Geonoma_orbignyana</i>       | 0.00125921            | Widespread |
| <i>Geonoma_lehmannii</i>        | 0.00217389            | Widespread |
| <i>Geonoma_undata</i>           | 0.00050834            | Widespread |
| <i>Geonoma_tenuissima</i>       | 0.00096142            | Widespread |
| <i>Geonoma_cuneata</i>          | 0.00177457            | Widespread |
| <i>Geonoma_stricta</i>          | 0.00241424            | Widespread |
| <i>Geonoma_leptospadix</i>      | 0.00112185            | Widespread |
| <i>Geonoma_lanata</i>           | 0.00179676            | Widespread |

|                                      |                       |            |
|--------------------------------------|-----------------------|------------|
| <i>Geonoma_bernalii</i>              | 0.00098148            | Endemic    |
| <i>Geonoma_simplicifrons</i>         | 0.00247975            | Widespread |
| <i>Geonoma_pauciflora</i>            | 0.00103193            | Endemic    |
| <i>Geonoma_pohlana</i>               | 0.00082196            | Endemic    |
| <i>Geonoma_maxima</i>                | 0.00353157            | Widespread |
| <i>Geonoma_congesta</i>              | 0.00187684            | Widespread |
| <i>Geonoma_calyptrigynoidea</i>      | 0.0011972             | Widespread |
| <i>Geonoma_triglochis</i>            | 4.300000000000048e-07 | Widespread |
| <i>Geonoma_concinna</i>              | 0.0004935             | Widespread |
| <i>Geonoma_multisecta</i>            | 0.00180768            | Widespread |
| <i>Geonoma_camana</i>                | 0.00284801            | Endemic    |
| <i>Geonoma_macrostachys</i>          | 0.00117895            | Widespread |
| <i>Choeroniscus_godmani</i>          | 0.01604902            | Widespread |
| <i>Choeroniscus_minor</i>            | 0.05443067            | Widespread |
| <i>Lichonycteris_obscura</i>         | 0.05600419            | Widespread |
| <i>Hylonycteris_underwoodi</i>       | 0.15117513            | Endemic    |
| <i>Anoura_cultrata</i>               | 0.06468379            | Widespread |
| <i>Anoura_caudifer</i>               | 0.08889086            | Widespread |
| <i>Anoura_geoffroyi</i>              | 0.04751273            | Widespread |
| <i>Anoura_latidens</i>               | 0.06179874            | Widespread |
| <i>Glossophaga_soricina</i>          | 0.09991896            | Widespread |
| <i>Glossophaga_commissaris</i>       | 0.0894681899999999    | Widespread |
| <i>Glossophaga_longirostris</i>      | 0.05022757            | Widespread |
| <i>Glossophaga_leachii</i>           | 0.05375237            | Endemic    |
| <i>Leptonycteris_curasoae</i>        | 0.00980146999999998   | Widespread |
| <i>Lonchophylla_mordax</i>           | 0.00364041999999998   | Widespread |
| <i>Lonchophylla_concava</i>          | 0.000958930000000024  | Widespread |
| <i>Lionycteris_spurrelli</i>         | 0.1258598             | Widespread |
| <i>Lonchophylla_chocoana</i>         | 0.0890497             | Widespread |
| <i>Lonchophylla_robusta</i>          | 0.07037846            | Widespread |
| <i>Lonchophylla_handleyi</i>         | 0.06913009            | Endemic    |
| <i>Gnetum_leyboldii</i>              | 0.00960796000000003   | Widespread |
| <i>Gnetum_urens</i>                  | 0.01543247            | Widespread |
| <i>Gnetum_nodiflorum</i>             | 0.00421318999999998   | Widespread |
| <i>Gnetum_schwackeanum</i>           | 0.01225314            | Widespread |
| <i>Gonatodes_albogularis</i>         | 0.15891727            | Widespread |
| <i>Gonatodes_vittatus</i>            | 0.15730273            | Widespread |
| <i>Gonatodes_ocellatus</i>           | 0.05394355            | Endemic    |
| <i>Gonatodes_concinnatus</i>         | 0.19957701            | Widespread |
| <i>Gonatodes_caudiscutatus</i>       | 0.29295441            | Widespread |
| <i>Lepidoblepharis_xanthostigma</i>  | 0.31515634            | End        |
| <i>Lepidoblepharis_festae</i>        | 0.25446895            | Endemic    |
| <i>Lepidoblepharis_sanctaemartae</i> | 0.50742884            | Widespread |
| <i>Habenaria_obtusa</i>              | 0.01840438            | Widespread |

|                                 |                      |            |
|---------------------------------|----------------------|------------|
| <i>Habenaria_distans</i>        | 0.01345369           | Endemic    |
| <i>Habenaria_monorrhiza</i>     | 0.01909618           | Widespread |
| <i>Habenaria_longicauda</i>     | 0.005183739999999999 | Widespread |
| <i>Habenaria_macronectar</i>    | 1.59999999999905e-06 | Endemic    |
| <i>Habenaria_bractescens</i>    | 0.00128342000000001  | Endemic    |
| <i>Habenaria_repens</i>         | 0.00658048           | Widespread |
| <i>Habenaria_trifida</i>        | 0.01059863           | Widespread |
| <i>Habenaria_armata</i>         | 0.00233533           | Widespread |
| <i>Habenaria_alata</i>          | 0.00230183           | Widespread |
| <i>Habenaria_caldensis</i>      | 0.01056272           | Endemic    |
| <i>Habenaria_roseiensis</i>     | 0.01250524           | Endemic    |
| <i>Habenaria_laevigata</i>      | 0.03663466           | Widespread |
| <i>Heliconius_aliphera</i>      | 0.04979113           | Widespread |
| <i>Heliconius_melpomene</i>     | 0.0146759            | Widespread |
| <i>Heliconius_timareta</i>      | 0.01854419           | Endemic    |
| <i>Heliconius_cydn</i>          | 0.21298894           | Widespread |
| <i>Heliconius_heurippa</i>      | 0.00259317999999997  | Endemic    |
| <i>Heliconius_ismenius</i>      | 0.02762058           | Widespread |
| <i>Heliconius_ethilla</i>       | 0.01653835           | Widespread |
| <i>Heliconius_godmani</i>       | 0.12380788           | Endemic    |
| <i>Heliconius_hecale</i>        | 0.01155142           | Widespread |
| <i>Heliconius_hecuba</i>        | 0.03430836           | Endemic    |
| <i>Heliconius_xanthocles</i>    | 0.04639259           | Endemic    |
| <i>Heliconius_doris</i>         | 0.05212785           | Widespread |
| <i>Heliconius_wallacei</i>      | 0.28303788           | Endemic    |
| <i>Heliconius_sara</i>          | 0.02282561           | Widespread |
| <i>Heliconius_leucadia</i>      | 0.04433206           | Endemic    |
| <i>Heliconius_antiochus</i>     | 0.03220506           | Widespread |
| <i>Heliconius_sapho</i>         | 0.03722455           | Widespread |
| <i>Heliconius_eleuchia</i>      | 0.02743403           | Widespread |
| <i>Heliconius_charithonia</i>   | 0.02017228           | Widespread |
| <i>Heliconius_hecalesia</i>     | 0.04266173           | Widespread |
| <i>Heliconius_erato</i>         | 0.0162662            | Widespread |
| <i>Heliconius_clysonymus</i>    | 0.02512681000000001  | Widespread |
| <i>Heliconius_telesiphe</i>     | 0.04317546000000001  | Widespread |
| <i>Agalychnis_spurrelli</i>     | 0.02836996           | Widespread |
| <i>Phyllomedusa_tomopterna</i>  | 0.20573916           | Widespread |
| <i>Trachycephalus_venulosus</i> | 0.00895975999999998  | Widespread |
| <i>Osteocephalus_buckleyi</i>   | 0.04944469           | Widespread |
| <i>Smilisca_sila</i>            | 0.0601292            | Widespread |
| <i>Smilisca_phaeota</i>         | 0.04872511           | Widespread |
| <i>Hyla_molleri</i>             | 0.03153018           | Endemic    |
| <i>Hypsiboas_punctatus</i>      | 0.0748487            | Widespread |
| <i>Hypsiboas_lanciformis</i>    | 0.0660595            | Widespread |

|                                   |                      |            |
|-----------------------------------|----------------------|------------|
| <i>Hypsiboas_pugnax</i>           | 0.04711167           | Widespread |
| <i>Hypsiboas_crepitans</i>        | 0.03936426           | Widespread |
| <i>Hypsiboas_rosenbergi</i>       | 0.04595224           | Widespread |
| <i>Hypsiboas_boans</i>            | 0.14394769           | Widespread |
| <i>Hyloscirtus_colymba</i>        | 0.06550661           | Endemic    |
| <i>Hyloscirtus_alytolylax</i>     | 0.01753004           | Widespread |
| <i>Hyloscirtus_phyllognathus</i>  | 0.0751415999999999   | Widespread |
| <i>Hyloscirtus_lascinius</i>      | 0.06334301           | Endemic    |
| <i>Hyloscirtus_palmeri</i>        | 0.07291143           | Widespread |
| <i>Hyloscirtus_psarolaimus</i>    | 0.02485221           | Widespread |
| <i>Hyloscirtus_staufferorum</i>   | 0.01251238           | Endemic    |
| <i>Hyloscirtus_ptychodactylus</i> | 0.00587503           | Endemic    |
| <i>Hyloscirtus_lindae</i>         | 0.00802547999999997  | Widespread |
| <i>Hyloscirtus_pantostictus</i>   | 0.00599240000000001  | Endemic    |
| <i>Dendropsophus_carnifex</i>     | 0.0731467            | Widespread |
| <i>Sphaenorhynchus_lacteus</i>    | 0.04406091           | Endemic    |
| <i>Osteocephalus_verruciger</i>   | 0.01295744           | Widespread |
| <i>Osteocephalus_cabrerae</i>     | 0.01486775000000001  | Endemic    |
| <i>Osteocephalus_mutabor</i>      | 0.00217491999999997  | Widespread |
| <i>Osteocephalus_carri</i>        | 0.12621863           | Endemic    |
| <i>Osteocephalus_alboguttatus</i> | 0.04234863           | Widespread |
| <i>Osteocephalus_taurinus</i>     | 0.02274814           | Widespread |
| <i>Trachycephalus_jordani</i>     | 0.24668046           | Widespread |
| <i>Dendropsophus_parviceps</i>    | 0.0601531            | Widespread |
| <i>Hypsiboas_picturatus</i>       | 0.07717717           | Widespread |
| <i>Hypsiboas_pellucens</i>        | 0.01783309           | Widespread |
| <i>Hypsiboas_rufitelus</i>        | 0.02734521           | Endemic    |
| <i>Scinax_boesemani</i>           | 0.08471011000000001  | Endemic    |
| <i>Dendropsophus_meridensis</i>   | 0.00672291999999997  | Widespread |
| <i>Dendropsophus_labialis</i>     | 2.57999999997427e-06 | Widespread |
| <i>Scinax_sugillatus</i>          | 0.13453273           | Widespread |
| <i>Osteocephalus_planiceps</i>    | 0.01097449000000001  | Endemic    |
| <i>Osteocephalus_fuscifacies</i>  | 0.02305136           | Endemic    |
| <i>Osteocephalus_deridens</i>     | 0.03240562           | Endemic    |
| <i>Osteocephalus_leprieurii</i>   | 0.00819331000000001  | Widespread |
| <i>Pseudis_paradoxa</i>           | 0.07374902           | Widespread |
| <i>Scinax_acuminatus</i>          | 0.04971041           | Endemic    |
| <i>Scinax_quinquefasciatus</i>    | 0.06805941           | Widespread |
| <i>Scinax_boulengeri</i>          | 0.05806676000000001  | Widespread |
| <i>Scinax_rostratus</i>           | 0.0292983            | Widespread |
| <i>Scinax_kennedyi</i>            | 0.02232013           | Endemic    |
| <i>Scinax_elaeochrous</i>         | 0.0559778            | Widespread |
| <i>Scinax_cruentomus</i>          | 0.07661281           | Widespread |
| <i>Scinax_wandae</i>              | 0.06475641           | Widespread |



|                                     |                       |            |
|-------------------------------------|-----------------------|------------|
| <i>Scinax_funereus</i>              | 0.05692226            | Widespread |
| <i>Scinax_ruber</i>                 | 0.05595849            | Widespread |
| <i>Dendropsophus_ebraccatus</i>     | 0.04795994            | Widespread |
| <i>Dendropsophus_subocularis</i>    | 0.0262814             | Widespread |
| <i>Dendropsophus_triangulum</i>     | 0.03465232            | Widespread |
| <i>Dendropsophus_leucophyllatus</i> | 0.03292621            | Widespread |
| <i>Dendropsophus_sarayacuensis</i>  | 0.03666411            | Widespread |
| <i>Dendropsophus_bifurcus</i>       | 0.05296542            | Widespread |
| <i>Dendropsophus_riveroi</i>        | 0.0591027000000001    | Endemic    |
| <i>Dendropsophus_minusculus</i>     | 0.02361571            | Endemic    |
| <i>Dendropsophus_mathiassoni</i>    | 0.01134336            | Widespread |
| <i>Dendropsophus_microcephalus</i>  | 0.05754755999999999   | Widespread |
| <i>Dendropsophus_phlebodes</i>      | 0.03563969999999999   | Widespread |
| <i>Dendropsophus_rhodopeplus</i>    | 0.04458103            | Widespread |
| <i>Dendropsophus_bokermanni</i>     | 0.07230824            | Widespread |
| <i>Dendrobates_truncatus</i>        | 0.08926051000000001   | Widespread |
| <i>Dendropsophus_marmoratus</i>     | 0.05400977            | Widespread |
| <i>Cruziophyla_calcarifer</i>       | 0.05541108000000001   | Endemic    |
| <i>Hylomantis_hulli</i>             | 0.03420959            | Endemic    |
| <i>Phyllomedusa_perinesos</i>       | 0.05027922000000001   | Widespread |
| <i>Phyllomedusa_hypochondrialis</i> | 0.15700147            | Widespread |
| <i>Phyllomedusa_bicolor</i>         | 0.05976008999999999   | Widespread |
| <i>Kinosternon_leucostomum</i>      | 0.12953025            | Widespread |
| <i>Kinosternon_scorpioides</i>      | 0.02384345            | Widespread |
| <i>Kinosternon_dunni</i>            | 0.01834405            | Endemic    |
| <i>Nothopsis_rugosus</i>            | 0.16875524            | Widespread |
| <i>Leptodeira_annulata</i>          | 0.07738018            | Widespread |
| <i>Leptodeira_septentrionalis</i>   | 0.03499712            | Widespread |
| <i>Imantodes_cenchoa</i>            | 0.0384621             | Widespread |
| <i>Imantodes_inornatus</i>          | 0.04484109            | Widespread |
| <i>Imantodes_gemmistratus</i>       | 0.11950411            | Endemic    |
| <i>Imantodes_chocoensis</i>         | 0.05320079            | Endemic    |
| <i>Imantodes_lentiferus</i>         | 0.07006995            | Widespread |
| <i>Lupinus_pubescens</i>            | 3.79999999994274e-07  | Widespread |
| <i>Lupinus_prostratus</i>           | 0.0004947100000000009 | Endemic    |
| <i>Lupinus_nubigenus</i>            | 0.0009870700000000007 | Widespread |
| <i>Lupinus_solanagrorum</i>         | 7.50000000007689e-07  | Endemic    |
| <i>Lupinus_sarmentosus</i>          | 2.00000000033507e-08  | Widespread |
| <i>Lupinus_ramosissimus</i>         | 1.89999999997137e-07  | Widespread |
| <i>Lupinus_huigrensis</i>           | 1.48300000000073e-05  | Endemic    |
| <i>Lupinus_arvensis</i>             | 0                     | Widespread |
| <i>Lupinus_microphyllus</i>         | 0.00049115000000001   | Widespread |
| <i>Lupinus_lindleyanus</i>          | 0.00147643            | Endemic    |
| <i>Lupinus_perennis</i>             | 9.99999999473644e-09  | Endemic    |

|                                      |                      |            |
|--------------------------------------|----------------------|------------|
| <i>Lupinus_guaraniticus</i>          | 0.00399408           | Endemic    |
| <i>Lupinus_semperflorens</i>         | 0.00221503000000001  | Widespread |
| <i>Lupinus_bogotensis</i>            | 3.79999999994274e-07 | Widespread |
| <i>Lupinus_mutabilis</i>             | 1.89999999983259e-07 | Widespread |
| <i>Lupinus_albus</i>                 | 0.00842013999999999  | Widespread |
| <i>Lontra_longicaudis</i>            | 0.00158462           | Widespread |
| <i>Pteronura_brasiliensis</i>        | 0.00386959           | Widespread |
| <i>Cerdocyon_thous</i>               | 0.01465211           | Widespread |
| <i>Phlegmariurus_lindenii</i>        | 0.00271725           | Widespread |
| <i>Phlegmariurus_campianus</i>       | 0.00248598           | Widespread |
| <i>Phlegmariurus_rosenstockianus</i> | 0.00236598999999998  | Widespread |
| <i>Phlegmariurus_linifolius</i>      | 0.000886979999999982 | Widespread |
| <i>Phlegmariurus_sarmentosus</i>     | 0.000442780000000004 | Widespread |
| <i>Phlegmariurus_reflexus</i>        | 0.000845579999999985 | Widespread |
| <i>Phlegmariurus_eversus</i>         | 4.29999999995712e-07 | Widespread |
| <i>Huperzia_eversa</i>               | 4.29999999995712e-07 | Widespread |
| <i>Phlegmariurus_capellae</i>        | 4.29999999995712e-07 | Widespread |
| <i>Phlegmariurus_attenuatus</i>      | 0.000599070000000007 | Widespread |
| <i>Phlegmariurus_crassus</i>         | 0.001106             | Widespread |
| <i>Phlegmariurus_cumingii</i>        | 0.00124759000000002  | Widespread |
| <i>Phlegmariurus_hystrix</i>         | 4.29999999995712e-07 | Widespread |
| <i>Phlegmariurus_rufescens</i>       | 1.5999999999905e-07  | Widespread |
| <i>Phlegmariurus_compactus</i>       | 0.00107305999999999  | Endemic    |
| <i>Phlegmariurus_dichotomus</i>      | 0.00486803000000002  | Widespread |
| <i>Phlegmariurus_hippurideus</i>     | 0.00115379000000002  | Widespread |
| <i>Huperzia_wilsonii</i>             | 0.00287406000000001  | Endemic    |
| <i>Phlegmariurus_dichaeoides</i>     | 0.02737332           | Widespread |
| <i>Phlegmariurus_ericifolius</i>     | 4.29999999995712e-07 | Widespread |
| <i>Huperzia_selago</i>               | 0.000550379999999989 | Endemic    |
| <i>Huperzia_miyoshiana</i>           | 2.10000000000488e-07 | Endemic    |
| <i>Lycopodium_jussiaei</i>           | 0.00942492           | Widespread |
| <i>Diphasiastrum_complanatum</i>     | 4.65999999998967e-06 | Widespread |
| <i>Diphasiastrum_thyoides</i>        | 0.01202295           | Widespread |
| <i>Lycopodium_vestitum</i>           | 3.4780000000012e-05  | Endemic    |
| <i>Lycopodium_clavatum</i>           | 0.01130376           | Widespread |
| <i>Lycopodiella_alopecuroides</i>    | 0.00498477999999999  | Widespread |
| <i>Phlegmariurus_funiformis</i>      | 0.00408743           | Widespread |
| <i>Phlegmariurus_filiformis</i>      | 0.00427547           | Endemic    |
| <i>Macleania_coccoloboides</i>       | 0.00374889           | Widespread |
| <i>Macleania_bullata</i>             | 0.00448419           | Widespread |
| <i>Macleania_floribunda</i>          | 0.00277325           | Widespread |
| <i>Macleania_cordifolia</i>          | 0.00392019           | Widespread |
| <i>Macleania_rupestris</i>           | 0.0039251            | Widespread |
| <i>Macleania_insignis</i>            | 0.00235672           | Endemic    |

|                                   |                       |            |
|-----------------------------------|-----------------------|------------|
| <i>Macleania_rotundifolia</i>     | 0.01590158            | Widespread |
| <i>Macleania_smithiana</i>        | 0.00134869            | Widespread |
| <i>Androdon_aequatorialis</i>     | 0.02767055            | Widespread |
| <i>Polytmus_guainumbi</i>         | 0.01142814            | Widespread |
| <i>Polytmus_milleri</i>           | 0.00703247            | Endemic    |
| <i>Chrysolampis_mosquitus</i>     | 0.01075025            | Widespread |
| <i>Anthracothorax_nigricollis</i> | 0.00473622            | Widespread |
| <i>Anthracothorax_prevostii</i>   | 0.03080905            | Widespread |
| <i>Schistes_geoffroyi</i>         | 0.01770383            | Widespread |
| <i>Doryfera_johannae</i>          | 0.00957584            | Widespread |
| <i>Colibri_thalassinus</i>        | 0.00997312            | Widespread |
| <i>Colibri_coruscans</i>          | 0.00833766            | Widespread |
| <i>Colibri_delphinae</i>          | 0.00935633            | Widespread |
| <i>Drymoluber_dichrous</i>        | 0.04262663            | Widespread |
| <i>Mastigodryas_melanolomus</i>   | 0.05598571            | Endemic    |
| <i>Mastigodryas_boddaerti</i>     | 0.03143241            | Widespread |
| <i>Mastigodryas_bifossatus</i>    | 0.02267653            | Widespread |
| <i>Maxillaria_suarezorum</i>      | 0.03023372            | Endemic    |
| <i>Maxillaria_gigantea</i>        | 0.02054001            | Widespread |
| <i>Maxillaria_splendens</i>       | 0.03194021            | Widespread |
| <i>Maxillaria_bradei</i>          | 0.00512545            | Widespread |
| <i>Maxillaria_bolivarensis</i>    | 0.00858863            | Widespread |
| <i>Maxillaria_ochroleuca</i>      | 0.00631215            | Widespread |
| <i>Maxillaria_pulla</i>           | 0.01457046            | Endemic    |
| <i>Maxillaria_chionantha</i>      | 0.01179619            | Endemic    |
| <i>Maxillaria_brachybulbon</i>    | 0.02043693            | Widespread |
| <i>Maxillaria_fractiflexa</i>     | 0.006158479999999999  | Widespread |
| <i>Maxillaria_lepidota</i>        | 0.01134324            | Widespread |
| <i>Maxillaria_whittenii</i>       | 0.01701991            | Endemic    |
| <i>Maxillaria_neophylla</i>       | 0.00395848            | Widespread |
| <i>Maxillaria_rubioi</i>          | 0.00288589            | Widespread |
| <i>Maxillaria_porrecta</i>        | 0.00579715            | Widespread |
| <i>Maxillaria_cryptobulbon</i>    | 0.01071749            | Widespread |
| <i>Maxillaria_ringens</i>         | 0.006121909999999999  | Widespread |
| <i>Maxillaria_perryae</i>         | 0.0086232             | Endemic    |
| <i>Maxillaria_pauciflora</i>      | 0.01028025            | Endemic    |
| <i>Maxillaria_angustissima</i>    | 0.0177039             | Widespread |
| <i>Maxillaria_reichenheimiana</i> | 0.00624742            | Endemic    |
| <i>Maxillaria_atwoodiana</i>      | 0.0053137             | Endemic    |
| <i>Maxillaria_patens</i>          | 0.00225936            | Widespread |
| <i>Maxillaria_jucunda</i>         | 0.00166042            | Endemic    |
| <i>Maxillaria_molitor</i>         | 0.0005528000000000006 | Endemic    |
| <i>Maxillaria_longissima</i>      | 0.00464085            | Widespread |
| <i>Maxillaria_striata</i>         | 0.01733485            | Endemic    |

|                                   |                      |            |
|-----------------------------------|----------------------|------------|
| <i>Maxillaria_fletcheriana</i>    | 0.00449098000000001  | Widespread |
| <i>Maxillaria_grandis</i>         | 0.00168289000000001  | Widespread |
| <i>Maxillaria_sanderiana</i>      | 0.00304159           | Widespread |
| <i>Maxillaria_meridensis</i>      | 0.01439333           | Widespread |
| <i>Maxillaria_jostii</i>          | 0.00616319           | Endemic    |
| <i>Megascops_guatemalae</i>       | 0.0629504600001383   | Widespread |
| <i>Megascops_roboratus</i>        | 0.0464218300000994   | Widespread |
| <i>Megascops_watsonii</i>         | 0.0179701000001842   | Widespread |
| <i>Megascops_petersoni</i>        | 0.0822578699999212   | Widespread |
| <i>Megascops_colombianus</i>      | 0.0309900600000219   | Widespread |
| <i>Megascops_ingens</i>           | 0.0315769500000442   | Widespread |
| <i>Megascops_choliba</i>          | 0.0604833100001088   | Widespread |
| <i>Megascops_albogularis</i>      | 0.0568137000000206   | Widespread |
| <i>Melocactus_curvispinus</i>     | 3.45000000000206e-06 | Widespread |
| <i>Conepatus_semistriatus</i>     | 0.00877575999999999  | Widespread |
| <i>Metallura_tyrianthina</i>      | 0.00715              | Widespread |
| <i>Chalcostigma_herrani</i>       | 0.00567618           | Widespread |
| <i>Chalcostigma_stanleyi</i>      | 0.00557961           | Widespread |
| <i>Oxypogon_guerinii</i>          | 0.00455356           | Widespread |
| <i>Metallura_williami</i>         | 0.00031097000000001  | Widespread |
| <i>Micrathena_sagittata</i>       | 0.06376142           | Endemic    |
| <i>Micrathena_sexspinosa</i>      | 0.06261938           | Widespread |
| <i>Micrathena_plana</i>           | 0.12617883           | Widespread |
| <i>Micrathena_horrida</i>         | 0.19540592           | Endemic    |
| <i>Micrathena_schreibersi</i>     | 0.19179838           | Endemic    |
| <i>Micrurus_psyches</i>           | 0.01540443           | Widespread |
| <i>Micrurus_nigrocinctus</i>      | 0.05080706           | Widespread |
| <i>Micrurus_narduccii</i>         | 0.1585076            | Widespread |
| <i>Micrurus_hemprichii</i>        | 0.08085702           | Endemic    |
| <i>Micrurus_surinamensis</i>      | 0.05686298           | Widespread |
| <i>Micrurus_lemniscatus</i>       | 0.04692877           | Widespread |
| <i>Micrurus_spixii</i>            | 0.02558639           | Endemic    |
| <i>Micrurus_obscurus</i>          | 0.02528187           | Widespread |
| <i>Micrurus_mipartitus</i>        | 0.08872835           | Widespread |
| <i>Micrurus_dissoleucus</i>       | 0.12574378           | Widespread |
| <i>Electron_platyrrhynchum</i>    | 0.06405626           | Widespread |
| <i>Hylomanes_momotula</i>         | 0.12375633           | Widespread |
| <i>Baryphthengus_ruficapillus</i> | 0.02997596           | Widespread |
| <i>Baryphthengus_martii</i>       | 0.03286451           | Widespread |
| <i>Momotus_momota</i>             | 0.0309753            | Widespread |
| <i>Pteronotus_parnellii</i>       | 0.14799708           | Widespread |
| <i>Pteronotus_davyi</i>           | 0.03923782           | Widespread |
| <i>Pteronotus_gymnonotus</i>      | 0.03491095           | Widespread |
| <i>Pteronotus_personatus</i>      | 0.22596993           | Widespread |

|                                  |                       |            |
|----------------------------------|-----------------------|------------|
| <i>Mormoops_megalophylla</i>     | 0.19840481            | Widespread |
| <i>Morpho_granadensis</i>        | 0.04095455            | Endemic    |
| <i>Morpho_peleides</i>           | 0.01778944            | Widespread |
| <i>Morpho_helenor</i>            | 0.00830025000000001   | Widespread |
| <i>Morpho_achilles</i>           | 0.02205218            | Endemic    |
| <i>Morpho_amathonte</i>          | 0.03554068            | Endemic    |
| <i>Morpho_menelaus</i>           | 0.009938869999999999  | Widespread |
| <i>Morpho_sulkowskyi</i>         | 0.04191605            | Widespread |
| <i>Morpho_telemachus</i>         | 0.02932245            | Endemic    |
| <i>Morpho_theseus</i>            | 0.0113113             | Widespread |
| <i>Morpho_cypris</i>             | 0.04607192            | Widespread |
| <i>Galictis_vittata</i>          | 0.00281016            | Widespread |
| <i>Galictis_cuja</i>             | 0.00316152            | Endemic    |
| <i>Mustela_frenata</i>           | 0.00435829            | Widespread |
| <i>Cerdocyon_thous</i>           | 0.021841415           | Widespread |
| <i>Napeogenes_sulphureophila</i> | 0.00191755            | Endemic    |
| <i>Napeogenes_cranto</i>         | 0.0133776             | Endemic    |
| <i>Napeogenes_tolosa</i>         | 0.01045352            | Widespread |
| <i>Napeogenes_stella</i>         | 0.00384556            | Widespread |
| <i>Napeogenes_sylphis</i>        | 0.00542795            | Endemic    |
| <i>Napeogenes_apulia</i>         | 0.00783741            | Endemic    |
| <i>Napeogenes_inachia</i>        | 0.00136756            | Widespread |
| <i>Napeogenes_peridia</i>        | 0.00823613            | Widespread |
| <i>Napeogenes_glycera</i>        | 0.00781934            | Endemic    |
| <i>Napeogenes_larina</i>         | 0.00874869            | Endemic    |
| <i>Natalus_stramineus</i>        | 0.0177248             | Endemic    |
| <i>Natalus_tumidirostris</i>     | 0.02106857            | Widespread |
| <i>Chilonatalus_tumidifrons</i>  | 0.06861281            | Endemic    |
| <i>Noctilio_leporinus</i>        | 0.04119552            | Widespread |
| <i>Noctilio_albiventris</i>      | 0.02325136            | Widespread |
| <i>Thyroptera_tricolor</i>       | 0.15121427            | Widespread |
| <i>Thyroptera_lavali</i>         | 0.01066399            | Endemic    |
| <i>Thyroptera_discifera</i>      | 0.04333983            | Widespread |
| <i>Opuntia_pittieri</i>          | 1.30999999997661e-06  | Widespread |
| <i>Opuntia_schumannii</i>        | 0.002600290000000001  | Widespread |
| <i>Opuntia_ficus-indica</i>      | 0.001714859999999998  | Widespread |
| <i>Opuntia_bella</i>             | 1.99999999894729e-08  | Endemic    |
| <i>Opuntia_bakeri</i>            | 0.001814729999999999  | Endemic    |
| <i>Opuntia_caracassana</i>       | 5.00000000014378e-07  | Widespread |
| <i>Opuntia_quitensis</i>         | 0.0009019299999999995 | Endemic    |
| <i>Opuntia_helleri</i>           | 0.001177380000000001  | Endemic    |
| <i>Opuntia_pubescens</i>         | 0.37439372            | Widespread |
| <i>Opuntia_stricta</i>           | 0                     | Widespread |
| <i>Ortalis_ruficauda</i>         | 0.001618059999999998  | Widespread |

|                                   |                      |            |
|-----------------------------------|----------------------|------------|
| <i>Ortalis_garrula</i>            | 0.01289553           | Widespread |
| <i>Ortalis_guttata</i>            | 0.0263182799999999   | Widespread |
| <i>Ortalis_cinereiceps</i>        | 0.01608628           | Widespread |
| <i>Pereskia_aculeata</i>          | 0.00025559           | Widespread |
| <i>Micronycteris_schmidtorum</i>  | 0.03948477           | Widespread |
| <i>Micronycteris_minuta</i>       | 0.02618161           | Widespread |
| <i>Micronycteris_microtis</i>     | 0.01786506           | Widespread |
| <i>Micronycteris_megalotis</i>    | 0.0066549599999999   | Widespread |
| <i>Lampronnycteris_brachyotis</i> | 0.00297473999999998  | Widespread |
| <i>Trinycteris_nicefori</i>       | 0.000270669999999973 | Widespread |
| <i>Glyphonycteris_sylvestris</i>  | 0.09815427           | Widespread |
| <i>Glyphonycteris_daviesi</i>     | 0.09410875           | Endemic    |
| <i>Lonchorhina_aurita</i>         | 0.099209             | Widespread |
| <i>Mimon_bennettii</i>            | 0.03501173           | Endemic    |
| <i>Chrotopterus_auritus</i>       | 0.10930593           | Widespread |
| <i>Vampyrum_spectrum</i>          | 0.0960620599999999   | Widespread |
| <i>Tonatia_bidens</i>             | 0.04395703           | Widespread |
| <i>Tonatia_saurophila</i>         | 0.04025628           | Widespread |
| <i>Mimon_crenulatum</i>           | 0.11298541           | Widespread |
| <i>Phyllostomus_discolor</i>      | 0.22255469           | Widespread |
| <i>Phyllostomus_latifolius</i>    | 0.02359679           | Endemic    |
| <i>Phyllostomus_elongatus</i>     | 0.05260961           | Widespread |
| <i>Phyllostomus_hastatus</i>      | 0.0429426            | Widespread |
| <i>Macrophyllum_macrophyllum</i>  | 0.13761656           | Widespread |
| <i>Trachops_cirrhosus</i>         | 0.11870195           | Widespread |
| <i>Piper_pseudolindenii</i>       | 0.03039822           | Widespread |
| <i>Piper_amalago</i>              | 0.0038449599999999   | Widespread |
| <i>Piper_reticulatum</i>          | 0.0269273200000001   | Widespread |
| <i>Piper_dariense</i>             | 0.03536231           | Widespread |
| <i>Piper_anisum</i>               | 0.00542870000000006  | Endemic    |
| <i>Piper_marginatum</i>           | 0.03108566           | Widespread |
| <i>Piper_multiplinervium</i>      | 0.02091343           | Widespread |
| <i>Piper_cararensense</i>         | 0.00872142999999992  | Widespread |
| <i>Piper_nudifolium</i>           | 2.42000000005849e-06 | Widespread |
| <i>Piper_hispidium</i>            | 0.02182894           | Widespread |
| <i>Piper_villiramulum</i>         | 0.01681025           | Widespread |
| <i>Piper_immutatum</i>            | 0.00923947000000003  | Widespread |
| <i>Piper_colonense</i>            | 0.02305963           | Endemic    |
| <i>Piper_lanceifolium</i>         | 2.42000000005849e-06 | Widespread |
| <i>Piper_filistilum</i>           | 0.01609447           | Widespread |
| <i>Piper_brachypodon</i>          | 0.0168545099999999   | Widespread |
| <i>Piper_oxystachyum</i>          | 0.00475980999999992  | Widespread |
| <i>Piper_ottoniaefolium</i>       | 0.00667814999999994  | Widespread |
| <i>Piper_costatum</i>             | 0.00252151           | Widespread |

|                                    |                      |            |
|------------------------------------|----------------------|------------|
| <i>Piper_divaricatum</i>           | 0.00303939999999991  | Widespread |
| <i>Piper_crassinervium</i>         | 0.04734163           | Widespread |
| <i>Piper_subscutatum</i>           | 0.00243519999999997  | Widespread |
| <i>Piper_callosum</i>              | 1.20999999997373e-06 | Widespread |
| <i>Piper_munchanum</i>             | 0.00476052999999999  | Widespread |
| <i>Piper_augustum</i>              | 1.66600000000017e-05 | Widespread |
| <i>Piper_garagaranum</i>           | 0.0220855600000001   | Widespread |
| <i>Piper_trigonum</i>              | 0.03401935           | Widespread |
| <i>Piper_arieianum</i>             | 2.42000000005849e-06 | Widespread |
| <i>Piper_confertinodum</i>         | 0.00648802999999998  | Widespread |
| <i>Piper_chuarensense</i>          | 0.00300451000000002  | Widespread |
| <i>Piper_longispicum</i>           | 0.01171247999999999  | Widespread |
| <i>Piper_bellidifolium</i>         | 0.00351541           | Widespread |
| <i>Piper_fimbriulatum</i>          | 0.00603942000000002  | Widespread |
| <i>Piper_euryphyllum</i>           | 0.00269670999999994  | Endemic    |
| <i>Piper_maxonii</i>               | 0.00278550999999994  | Endemic    |
| <i>Piper_gibbosum</i>              | 0.00475766           | Endemic    |
| <i>Piper_obliquum</i>              | 0.00355172000000004  | Widespread |
| <i>Piper_squamulosum</i>           | 0.00771473           | Widespread |
| <i>Piper_daguanum</i>              | 0.00979050000000004  | Widespread |
| <i>Piper_melanocladum</i>          | 0.00382191000000009  | Widespread |
| <i>Piper_candollei</i>             | 0.00234639999999997  | Widespread |
| <i>Piper_cernuum</i>               | 0.00442419999999999  | Widespread |
| <i>Piper_truncatum</i>             | 0.00624106000000002  | Endemic    |
| <i>Piper_obtusilimum</i>           | 0.000865369999999976 | Widespread |
| <i>Piper_marsupiferum</i>          | 0.00371036999999996  | Widespread |
| <i>Piper_pulchrum</i>              | 0.281844             | Widespread |
| <i>Piper_biseriatum</i>            | 0.00172039999999996  | Widespread |
| <i>Piper_tuberculatum</i>          | 0.05638161           | Widespread |
| <i>Piper_arboreum</i>              | 0.01929335           | Widespread |
| <i>Piper_auritum</i>               | 0.04363016           | Widespread |
| <i>Piper_peltatum</i>              | 0.03808489           | Widespread |
| <i>Piper_umbellatum</i>            | 0.02955643000000001  | Widespread |
| <i>Piper_cinereum</i>              | 0.06519204999999999  | Widespread |
| <i>Callicebus_cupreus</i>          | 0.0176962            | Widespread |
| <i>Callicebus_moloch</i>           | 0.01129074           | Endemic    |
| <i>Callicebus_torquatus</i>        | 0.00188747           | Widespread |
| <i>Pithecia_monachus</i>           | 0.00217637999999998  | Endemic    |
| <i>Vampyroides_caraccioli</i>      | 0.10629395           | Widespread |
| <i>Platyrrhinus_lineatus</i>       | 0.0320802            | Widespread |
| <i>Platyrrhinus_ismaeli</i>        | 0.01249534           | Widespread |
| <i>Platyrrhinus_dorsalis</i>       | 0.03955161           | Widespread |
| <i>Platyrrhinus_brachycephalus</i> | 0.08386044           | Widespread |
| <i>Platyrrhinus_matapalensis</i>   | 0.02644683           | Widespread |

|                                     |                      |            |
|-------------------------------------|----------------------|------------|
| <i>Platyrrhinus_helleri</i>         | 0.03432528           | Widespread |
| <i>Platyrrhinus_vittatus</i>        | 0.01178786           | Widespread |
| <i>Platyrrhinus_albericoi</i>       | 0.01257455           | Widespread |
| <i>Platyrrhinus_aurarius</i>        | 0.03279574           | Widespread |
| <i>Platyrrhinus_infuscus</i>        | 0.03355175           | Widespread |
| <i>Uroderma_magnirostrum</i>        | 0.0235235            | Widespread |
| <i>Uroderma_bilobatum</i>           | 0.08094543           | Widespread |
| <i>Podilymbus_podiceps</i>          | 0.06437928           | Widespread |
| <i>Tachybaptus_dominicus</i>        | 0.05276992           | Widespread |
| <i>Podiceps_major</i>               | 0.04643424           | Endemic    |
| <i>Pristimantis_crenunguis</i>      | 0.0806233800000022   | Endemic    |
| <i>Pristimantis_labiosus</i>        | 0.1107969299999999   | Widespread |
| <i>Pristimantis_actites</i>         | 0.215495920000002    | Endemic    |
| <i>Pristimantis_lanthanites</i>     | 0.2930948899999999   | Widespread |
| <i>Pristimantis_caryophyllaceus</i> | 0.2768564799999999   | Widespread |
| <i>Pristimantis_cremnobates</i>     | 0.17570212           | Endemic    |
| <i>Pristimantis_ridens</i>          | 0.2143266399999999   | Widespread |
| <i>Pristimantis_colomai</i>         | 0.187398560000002    | Widespread |
| <i>Pristimantis_cruentus</i>        | 0.1858769            | Widespread |
| <i>Pristimantis_erythropleura</i>   | 0.0755437200000024   | Widespread |
| <i>Pristimantis_paisa</i>           | 0.00265490000000312  | Widespread |
| <i>Pristimantis_viejas</i>          | 0.0270029400000027   | Endemic    |
| <i>Pristimantis_gaigei</i>          | 0.1995268199999999   | Widespread |
| <i>Pristimantis_conspicillatus</i>  | 0.1370879999999999   | Widespread |
| <i>Pristimantis_condor</i>          | 0.0865333200000009   | Endemic    |
| <i>Pristimantis_malkini</i>         | 0.1451361399999998   | Endemic    |
| <i>Pristimantis_achatinus</i>       | 0.1126931400000001   | Widespread |
| <i>Pristimantis_fenestratus</i>     | 0.0376146400000001   | Endemic    |
| <i>Pristimantis_savagei</i>         | 0.1746281699999998   | Widespread |
| <i>Pristimantis_nervicus</i>        | 0.0807589499999999   | Widespread |
| <i>Pristimantis_affinis</i>         | 0.09294308000000013  | Widespread |
| <i>Pristimantis_caprifer</i>        | 0.2629841699999999   | Widespread |
| <i>Pristimantis_eriphus</i>         | 0.1431609900000002   | Endemic    |
| <i>Pristimantis_suetus</i>          | 0.09876332000000033  | Widespread |
| <i>Pristimantis_peruvianus</i>      | 0.16733962           | Widespread |
| <i>Pristimantis_acerus</i>          | 0.1059158000000002   | Endemic    |
| <i>Pristimantis_inusitatus</i>      | 0.06727066000000019  | Endemic    |
| <i>Pristimantis_glandulosus</i>     | 0.1266978800000002   | Endemic    |
| <i>Pristimantis_orcesi</i>          | 0.1602399500000001   | Endemic    |
| <i>Pristimantis_appendiculatus</i>  | 0.2163651500000001   | Endemic    |
| <i>Pristimantis_dissimulatus</i>    | 0.11745951           | Endemic    |
| <i>Pristimantis_calcarulatus</i>    | 0.1933585099999999   | Endemic    |
| <i>Pristimantis_crucifer</i>        | 0.2580707800000001   | Endemic    |
| <i>Pristimantis_subsigillatus</i>   | 8.09000000145943e-06 | Widespread |



|                                    |                      |            |
|------------------------------------|----------------------|------------|
| <i>Pristimantis_nyctophylax</i>    | 0.206873959999999    | Endemic    |
| <i>Pristimantis_moro</i>           | 0.11760044           | Endemic    |
| <i>Pristimantis_acuminatus</i>     | 0.2504314            | Widespread |
| <i>Pristimantis_galdi</i>          | 0.146247389999999    | Widespread |
| <i>Pristimantis_quaquaversus</i>   | 0.0816560499999994   | Widespread |
| <i>Pristimantis_latidiscus</i>     | 25.8444508           | Widespread |
| <i>Pristimantis_cryophilus</i>     | 0.417796880000001    | Endemic    |
| <i>Pristimantis_phoxocephalus</i>  | 0.132761080000002    | Widespread |
| <i>Pristimantis_riveti</i>         | 0.111169199999999    | Endemic    |
| <i>Pristimantis_versicolor</i>     | 0.128341370000001    | Endemic    |
| <i>Pristimantis_simonbolivari</i>  | 0.10522027           | Endemic    |
| <i>Pristimantis_ockendeni</i>      | 0.230231710000002    | Widespread |
| <i>Pristimantis_unistrigatus</i>   | 0.103761679999998    | Widespread |
| <i>Pristimantis_cajamarcensis</i>  | 0.157559899999999    | Endemic    |
| <i>Pristimantis_frater</i>         | 0.13665228           | Widespread |
| <i>Pristimantis_bogotensis</i>     | 0.104010769999999    | Widespread |
| <i>Pristimantis_taeiniatus</i>     | 0.132545889999999    | Widespread |
| <i>Pristimantis_miyatai</i>        | 0.142139579999998    | Widespread |
| <i>Pristimantis_zophus</i>         | 0.10333821           | Widespread |
| <i>Pristimantis_martiae</i>        | 0.124064820000001    | Widespread |
| <i>Pristimantis_librarius</i>      | 0.160034470000003    | Widespread |
| <i>Pristimantis_parvillus</i>      | 0.171021679999999    | Widespread |
| <i>Pristimantis_luteolateralis</i> | 0.0423974499999993   | Widespread |
| <i>Pristimantis_walkerii</i>       | 0.0352129699999999   | Widespread |
| <i>Pristimantis_chalceus</i>       | 0.202495280000001    | Widespread |
| <i>Pristimantis_croceinguinis</i>  | 0.134114950000001    | Widespread |
| <i>Pristimantis_diadematus</i>     | 0.161574880000003    | Widespread |
| <i>Pristimantis_altamazonicus</i>  | 0.10820842           | Widespread |
| <i>Pristimantis_brevifrons</i>     | 0.19409856           | Widespread |
| <i>Pristimantis_leoni</i>          | 0.11940959           | Widespread |
| <i>Pristimantis_pyrrhomerus</i>    | 0.106819999999999    | Endemic    |
| <i>Pristimantis_ocreatus</i>       | 0.1100669            | Endemic    |
| <i>Pristimantis_celator</i>        | 0.153780299999998    | Endemic    |
| <i>Pristimantis_verecundus</i>     | 0.237887690000001    | Widespread |
| <i>Pristimantis_thymalopsoides</i> | 0.15419078           | Endemic    |
| <i>Pristimantis_duellmani</i>      | 0.136927840000002    | Endemic    |
| <i>Pristimantis vertebralis</i>    | 0.123542350000001    | Endemic    |
| <i>Pristimantis_curtipes</i>       | 2.72999999850754e-06 | Widespread |
| <i>Pristimantis_buckleyi</i>       | 2.72999999850754e-06 | Widespread |
| <i>Pristimantis_devillei</i>       | 0.113414799999997    | Widespread |
| <i>Pristimantis_surdus</i>         | 0.113324739999999    | Endemic    |
| <i>Pristimantis_truebae</i>        | 0.0117903300000002   | Endemic    |
| <i>Pristimantis_gentryi</i>        | 0.0226633400000011   | Endemic    |
| <i>Pristimantis_thymelensis</i>    | 0.063890139999998    | Endemic    |

|                                    |                      |            |
|------------------------------------|----------------------|------------|
| <i>Pristimantis_chloronotus</i>    | 0.10762471           | Widespread |
| <i>Pristimantis_supernatis</i>     | 0.123622600000001    | Widespread |
| <i>Potos_flavus</i>                | 0.04576388           | Widespread |
| <i>Procyon_lotor</i>               | 0.09734753           | Endemic    |
| <i>Procyon_cancrivorus</i>         | 0.01417711           | Widespread |
| <i>Nasua_nasua</i>                 | 0.0222946            | Widespread |
| <i>Nasua_narica</i>                | 0.01329512           | Widespread |
| <i>Nasuella_olivacea</i>           | 0.01408321           | Widespread |
| <i>Bassaricyon_neblina</i>         | 0.01716377           | Widespread |
| <i>Bassaricyon_gabbii</i>          | 0.00925985           | Widespread |
| <i>Bassaricyon_alleni</i>          | 0.00668605999999999  | Widespread |
| <i>Aulacorhynchus_prasinus</i>     | 0.0816906            | Widespread |
| <i>Aulacorhynchus_haematopygus</i> | 0.04413739           | Widespread |
| <i>Aulacorhynchus_sulcatus</i>     | 0.04661797           | Widespread |
| <i>Aulacorhynchus_derbianus</i>    | 0.03963737           | Widespread |
| <i>Selenidera_spectabilis</i>      | 0.06960659           | Widespread |
| <i>Andigena_hypoglauca</i>         | 0.0218924            | Widespread |
| <i>Andigena_laminirostris</i>      | 0.03468031           | Widespread |
| <i>Andigena_nigrirostris</i>       | 0.02764129           | Widespread |
| <i>Selenidera_reinwardtii</i>      | 0.03486737           | Widespread |
| <i>Pteroglossus_castanotis</i>     | 0.02619174           | Widespread |
| <i>Pteroglossus_pluricinctus</i>   | 0.01151720999999999  | Widespread |
| <i>Pteroglossus_torquatus</i>      | 0.05390933           | Widespread |
| <i>Pteroglossus_aracari</i>        | 0.03093337           | Endemic    |
| <i>Pteroglossus_viridis</i>        | 0.03130407           | Endemic    |
| <i>Pteroglossus_inscriptus</i>     | 0.02815117           | Widespread |
| <i>Ramphastos_sulfuratus</i>       | 0.0509039            | Widespread |
| <i>Ramphastos_vitellinus</i>       | 0.02421481           | Widespread |
| <i>Ramphastos_brevis</i>           | 0.01831779           | Widespread |
| <i>Ramphastos_tucanus</i>          | 0.02663549           | Widespread |
| <i>Ramphastos_swainsonii</i>       | 0.00836088000000001  | Widespread |
| <i>Ramphastos_ambiguus</i>         | 0.01084865           | Widespread |
| <i>Sphagnum_palustre</i>           | 3.6420000000037e-05  | Endemic    |
| <i>Sphagnum_magellanicum</i>       | 0.000927800000000034 | Widespread |
| <i>Sphagnum_perichaetiale</i>      | 1.03299999999473e-05 | Widespread |
| <i>Sphagnum_cyclophyllum</i>       | 0.07232875           | Widespread |
| <i>Sphagnum_sonsonense</i>         | 0.000865919999999964 | Widespread |
| <i>Sphagnum_cuculliforme</i>       | 0.00225471999999993  | Endemic    |
| <i>Sphagnum_strictum</i>           | 0.0166913599999999   | Widespread |
| <i>Sphagnum_recurvum</i>           | 0.000626030000000055 | Widespread |
| <i>Sphagnum_tenellum</i>           | 0.00460410999999994  | Widespread |
| <i>Sphagnum_cuspidatum</i>         | 0.00049005000000002  | Widespread |
| <i>Sphagnum_sancto-josephense</i>  | 0.00106340999999999  | Widespread |
| <i>Sphagnum_pulchrum</i>           | 0.000556879999999982 | Endemic    |

|                                   |                       |            |
|-----------------------------------|-----------------------|------------|
| <i>Sphagnum_laxirameum</i>        | 0.0006129599999999996 | Endemic    |
| <i>Sphagnum_aciphyllum</i>        | 0.0008174699999999987 | Endemic    |
| <i>Sphagnum_subsecundum</i>       | 0.005053570000000006  | Widespread |
| <i>Sphagnum_flaccidum</i>         | 0.002084540000000002  | Endemic    |
| <i>Sphagnum_santanderense</i>     | 0.005509219999999998  | Endemic    |
| <i>Sphagnum_lescurii</i>          | 0.002153489999999998  | Widespread |
| <i>Sphagnum_rotundatum</i>        | 0.001007949999999998  | Widespread |
| <i>Sphagnum_denticulatum</i>      | 0.00165735            | Widespread |
| <i>Sphagnum_platyphyllum</i>      | 0.01084043            | Endemic    |
| <i>Sphagnum_laegaardii</i>        | 0.008489480000000005  | Endemic    |
| <i>Sphagnum_compactum</i>         | 0.0008775300000000015 | Widespread |
| <i>Sphagnum_oxyphyllum</i>        | 0.001582169999999994  | Widespread |
| <i>Sphagnum_squarrosum</i>        | 0.007296849999999997  | Endemic    |
| <i>Sphagnum_capillifolium</i>     | 2.21000000000249e-06  | Widespread |
| <i>Sphagnum_tenerum</i>           | 0.005798540000000002  | Widespread |
| <i>Sphagnum_nemoreum</i>          | 0.004262129999999998  | Widespread |
| <i>Sphagnum_sparsum</i>           | 1.0000000502476e-08   | Widespread |
| <i>Sphagnum_limbatum</i>          | 0.000351419999999991  | Widespread |
| <i>Sphagnum_meridense</i>         | 0.002131980000000003  | Widespread |
| <i>Sphagnum_lewisii</i>           | 0.0005817300000000058 | Endemic    |
| <i>Sphagnum_austro-americanum</i> | 0.0000000000000000001 | Endemic    |
| <i>Sturnira_bidens</i>            | 0.0655008             | Widespread |
| <i>Sturnira_lilium</i>            | 0.01621833            | Widespread |
| <i>Sturnira_luisi</i>             | 0.01775273            | Widespread |
| <i>Sturnira_tildae</i>            | 0.04554854            | Widespread |
| <i>Sturnira_mordax</i>            | 0.03092379            | Widespread |
| <i>Sturnira_magna</i>             | 0.0363642             | Widespread |
| <i>Sturnira_erythromos</i>        | 0.03406201            | Widespread |
| <i>Sturnira_bogotensis</i>        | 0.03053041            | Widespread |
| <i>Sturnira_ludovici</i>          | 0.0283377             | Widespread |
| <i>Sturnira_oporophilum</i>       | 1.60999999998523e-06  | Widespread |
| <i>Tangara_palmeri</i>            | 0.09790858            | Widespread |
| <i>Tangara_punctata</i>           | 0.04886694            | Widespread |
| <i>Tangara_guttata</i>            | 0.03737545            | Widespread |
| <i>Tangara_xanthogastra</i>       | 0.0351014             | Widespread |
| <i>Tangara_larvata</i>            | 0.02551348            | Widespread |
| <i>Tangara_cyanicollis</i>        | 0.0352975             | Widespread |
| <i>Tangara_nigrocincta</i>        | 0.03574115            | Widespread |
| <i>Tangara_cyanoptera</i>         | 0.03294677            | Widespread |
| <i>Tangara_heinei</i>             | 0.002306250000000001  | Widespread |
| <i>Tangara_argyrofenges</i>       | 0.001155739999999999  | Endemic    |
| <i>Tangara_vitriolina</i>         | 0.0137423             | Widespread |
| <i>Tangara_ruficervix</i>         | 0.08876813            | Widespread |
| <i>Tangara_vassorii</i>           | 0.05638682            | Widespread |

|                                |            |            |
|--------------------------------|------------|------------|
| <i>Tangara_nigroviridis</i>    | 0.04617351 | Widespread |
| <i>Tangara_gyrola</i>          | 0.02366559 | Widespread |
| <i>Tangara_lavinia</i>         | 0.05977709 | Widespread |
| <i>Tangara_chilensis</i>       | 0.03786345 | Widespread |
| <i>Tangara_callophrys</i>      | 0.02210466 | Widespread |
| <i>Tangara_velia</i>           | 0.01962161 | Widespread |
| <i>Tangara_mexicana</i>        | 0.03124464 | Widespread |
| <i>Tangara_inornata</i>        | 0.04057205 | Widespread |
| <i>Tangara_chrysotis</i>       | 0.06735951 | Widespread |
| <i>Tangara_xanthocephala</i>   | 0.0555636  | Widespread |
| <i>Tangara_johannae</i>        | 0.06426462 | Widespread |
| <i>Tangara_parzudakii</i>      | 0.07263707 | Widespread |
| <i>Tangara_schrankii</i>       | 0.04216379 | Widespread |
| <i>Tangara_arthus</i>          | 0.05753318 | Widespread |
| <i>Tangara_florida</i>         | 0.04190527 | Widespread |
| <i>Tangara_icterocephala</i>   | 0.03473608 | Widespread |
| <i>Tangara_cyanotis</i>        | 0.09210779 | Widespread |
| <i>Tangara_labradorides</i>    | 0.05248864 | Widespread |
| <i>Tangara_rufigenis</i>       | 0.08469248 | Endemic    |
| <i>Tinamus_major</i>           | 0.21520348 | Widespread |
| <i>Crypturellus_soui</i>       | 0.02902302 | Widespread |
| <i>Tinamus_guttatus</i>        | 0.00212324 | Endemic    |
| <i>Trogon_rufus</i>            | 0.01849652 | Widespread |
| <i>Trogon_collaris</i>         | 0.01570367 | Widespread |
| <i>Trogon_personatus</i>       | 0.02120734 | Widespread |
| <i>Trogon_viridis</i>          | 0.01572243 | Widespread |
| <i>Trogon_violaceus</i>        | 0.00653333 | Widespread |
| <i>Trogon_curucui</i>          | 0.00674706 | Widespread |
| <i>Trogon_comptus</i>          | 0.00939376 | Widespread |
| <i>Trogon_melanurus</i>        | 0.00510195 | Widespread |
| <i>Trogon_massena</i>          | 0.00947864 | Widespread |
| <i>Pharomachrus_mocinno</i>    | 0.01475261 | Widespread |
| <i>Pharomachrus_fulgidus</i>   | 0.00019757 | Widespread |
| <i>Pharomachrus_antisianus</i> | 7.6e-07    | Widespread |
| <i>Pharomachrus_pavoninus</i>  | 0.00861815 | Widespread |
| <i>Pharomachrus_auriceps</i>   | 0.00983585 | Widespread |
| <i>Tremarctos_ornatus</i>      | 0.00378777 | Widespread |
| <i>Mesophylla_macconnelli</i>  | 0.15581481 | Widespread |
| <i>Vampyressa_melissa</i>      | 0.12833033 | Widespread |
| <i>Vampyressa_thyone</i>       | 0.03582936 | Widespread |
| <i>Vampyressa_pusilla</i>      | 0.07888348 | Widespread |
| <i>Crotalus_basiliscus</i>     | 0.21951587 | Endemic    |
| <i>Crotalus_durissus</i>       | 0.03132018 | Widespread |
| <i>Lachesis_acrochorda</i>     | 0.02705623 | Widespread |

|                                     |                       |            |
|-------------------------------------|-----------------------|------------|
| <i>Lachesis_muta</i>                | 0.01896282            | Widespread |
| <i>Porthidium_nasutum</i>           | 0.02584055            | Widespread |
| <i>Porthidium_lansbergii</i>        | 0.02637622            | Widespread |
| <i>Bothrops_pulchra</i>             | 0.05703412            | Widespread |
| <i>Bothrops_bilineata</i>           | 0.03011639            | Widespread |
| <i>Bothrops_taeniata</i>            | 0.03025175            | Widespread |
| <i>Bothrops_punctatus</i>           | 0.03968678            | Widespread |
| <i>Bothrops_osbornei</i>            | 0.03446312            | Endemic    |
| <i>Bothrops_asper</i>               | 0.02782816            | Widespread |
| <i>Bothrops_atrox</i>               | 0.01526565            | Widespread |
| <i>Bothrocophias_microphthalmus</i> | 0.02606715            | Endemic    |
| <i>Xylocopa_frontalis</i>           | 0.06711566            | Widespread |
| <i>Xylocopa_fimbriata</i>           | 0.02149422            | Widespread |
| <i>Zamia_chigua</i>                 | 0.008371479999999999  | Widespread |
| <i>Zamia_gentryi</i>                | 0.003899839999999999  | Endemic    |
| <i>Zamia_restrepoi</i>              | 0.004708239999999997  | Endemic    |
| <i>Zamia_manicata</i>               | 0.0007014699999999982 | Widespread |
| <i>Zamia_poeppigiana</i>            | 1.40999999997948e-06  | Widespread |
| <i>Zamia_lindenii</i>               | 1.40999999997948e-06  | Widespread |
| <i>Zamia_encephalartoides</i>       | 0.00392743000000001   | Endemic    |
| <i>Zamia_lecointei</i>              | 0.00980656000000002   | Endemic    |
| <i>Zamia_muricata</i>               | 0.008173829999999999  | Widespread |
| <i>Zamia_obliqua</i>                | 0.00977401            | Widespread |
| <i>Zamia_pseudoparasitica</i>       | 0.01640417            | Endemic    |
