# Supplementary material for: Phylogenetic diversity and North Andean block conservation
Source: PeerJ journal article supplement (doi:10.7717/peerj.16565), 2023-12-06
Supplement: Supplementary_Table_S2.pdf [file Supplementary_Table_S2.pdf]

| Group                  | Number of species |           | Taxonomic Rank | Genes                                                                                             | GBIF                                                                                                                                                                       |
|------------------------|-------------------|-----------|----------------|---------------------------------------------------------------------------------------------------|----------------------------------------------------------------------------------------------------------------------------------------------------------------------------|
|                        | Distribution      | Terminals |                |                                                                                                   |                                                                                                                                                                            |
| <i>Acalypha</i>        | 10                | 34        | Genus          | TRNL-F, RBCL, MATK, ITS-18S, PSBA                                                                 | <a href="https://doi.org/10.15468/dl.ehuoxz">https://doi.org/10.15468/dl.ehuoxz</a><br><a href="https://doi.org/10.15468/dl.fbrdmp">https://doi.org/10.15468/dl.fbrdmp</a> |
| <i>Anolis</i>          | 36                | 180       | Genus          | CYT-B, 16S, ND2, COI, RAG1, ITS1-8S                                                               | <a href="https://doi.org/10.15468/dl.7ftxu8">https://doi.org/10.15468/dl.7ftxu8</a>                                                                                        |
| Aotidae                | 4                 | 8         | Family         | COII, COI, CYT-B, SRY, RAG1, POLA1, PNO, PLCB-4, BRCA-2, ADORA-3; BDNF                            | <a href="https://doi.org/10.15468/dl.dlflps">https://doi.org/10.15468/dl.dlflps</a>                                                                                        |
| <i>Aratinga</i>        | 12                | 49        | Genus          | RAG-1, CYT-B, NAD-2, 16S, 12S                                                                     | <a href="https://doi.org/10.15468/dl.akpopk">https://doi.org/10.15468/dl.akpopk</a>                                                                                        |
| <i>Ariteus</i>         | 3                 | 9         | Genus          | CYT-B, RAG-2, PLCB-4, ATP-7, BDNF, THY, ITS-18S                                                   | <a href="https://doi.org/10.15468/dl.dlflps">https://doi.org/10.15468/dl.dlflps</a>                                                                                        |
| Artibeina              | 16                | 24        | Subtribe       | CYT-B, RAG-2, PLCB-4, ATP-7, BDNF, COI, THY, ITS-18S                                              | <a href="https://doi.org/10.15468/dl.dlflps">https://doi.org/10.15468/dl.dlflps</a>                                                                                        |
| Atelidae               | 6                 | 20        | Family         | COI, COII, CYT-B, SRY, RAG-2, POLA-1, PNO, PLCB-4, BRCA-2, ADORA-3, BDNF                          | <a href="https://doi.org/10.15468/dl.dlflps">https://doi.org/10.15468/dl.dlflps</a>                                                                                        |
| <i>Atractus</i>        | 9                 | 18        | Genus          | 16S, 12S, C-MOS, NADH-4, CYT-B                                                                    | <a href="https://doi.org/10.15468/dl.7ftxu8">https://doi.org/10.15468/dl.7ftxu8</a>                                                                                        |
| <i>Bactris</i>         | 12                | 35        | Genus          | ITS-18S, TRNL-F, MATK, RPS-16, RPB-2, TRNQ, RBC-L                                                 | <a href="https://doi.org/10.15468/dl.ehuoxz">https://doi.org/10.15468/dl.ehuoxz</a><br><a href="https://doi.org/10.15468/dl.fbrdmp">https://doi.org/10.15468/dl.fbrdmp</a> |
| <i>Bazzania</i>        | 6                 | 25        | Genus          | RBC-L, PSB-A, 26S, NADH-1                                                                         | <a href="https://doi.org/10.15468/dl.pw758k">https://doi.org/10.15468/dl.pw758k</a>                                                                                        |
| <i>Bomarea</i>         | 25                | 55        | Genus          | MATK, PSB-A, RBC-L, ITS-18S, RPOB, NADH-F, MATR                                                   | <a href="https://doi.org/10.15468/dl.ehuoxz">https://doi.org/10.15468/dl.ehuoxz</a><br><a href="https://doi.org/10.15468/dl.fbrdmp">https://doi.org/10.15468/dl.fbrdmp</a> |
| <i>Bombus</i>          | 8                 | 52        | Genus          | EF-1, PEPCK, 16S                                                                                  | <a href="https://doi.org/10.15468/dl.jl4awt">https://doi.org/10.15468/dl.jl4awt</a>                                                                                        |
| <i>Caesalpinia</i>     | 6                 | 47        | Genus          | RPS-16, MARK, RBC-L, ITS-18S, ITS-5.8 S                                                           | <a href="https://doi.org/10.15468/dl.ehuoxz">https://doi.org/10.15468/dl.ehuoxz</a>                                                                                        |
| <i>Calamagrostis</i>   | 3                 | 32        | Genus          | TRNK-PSBA, RBC-L, ITS-18S, TRNL-F                                                                 | <a href="https://doi.org/10.15468/dl.ehuoxz">https://doi.org/10.15468/dl.ehuoxz</a><br><a href="https://doi.org/10.15468/dl.fbrdmp">https://doi.org/10.15468/dl.fbrdmp</a> |
| <i>Calceolaria</i>     | 26                | 100       | Genus          | ITS-18S, MATK, RBC-L                                                                              | <a href="https://doi.org/10.15468/dl.ehuoxz">https://doi.org/10.15468/dl.ehuoxz</a><br><a href="https://doi.org/10.15468/dl.fbrdmp">https://doi.org/10.15468/dl.fbrdmp</a> |
| <i>Caligo</i>          | 7                 | 11        | Genus          | COI, CAD, RPS5, GAPDH, EF-1A                                                                      | <a href="https://doi.org/10.15468/dl.jl4awt">https://doi.org/10.15468/dl.jl4awt</a>                                                                                        |
| Canidae                | 5                 | 36        | Family         | COI, COII, CYT-B, APOB, GHR, CHRNA-1, PNO, RAG-1                                                  | <a href="https://doi.org/10.15468/dl.dlflps">https://doi.org/10.15468/dl.dlflps</a>                                                                                        |
| <i>Canthon</i>         | 5                 | 14        | Genus          | 28S, 18S, 16S, COI                                                                                | <a href="https://doi.org/10.15468/dl.jl4awt">https://doi.org/10.15468/dl.jl4awt</a>                                                                                        |
| Capitonidae            | 8                 | 13        | Family         | CYT-B, NADH2, COI, FB-7                                                                           | <a href="https://doi.org/10.15468/dl.akpopk">https://doi.org/10.15468/dl.akpopk</a>                                                                                        |
| <i>Catasticta</i>      | 2                 | 7         | Genus          | COI, EF-1A, WING                                                                                  | <a href="https://doi.org/10.15468/dl.ehuoxz">https://doi.org/10.15468/dl.ehuoxz</a><br><a href="https://doi.org/10.15468/dl.fbrdmp">https://doi.org/10.15468/dl.fbrdmp</a> |
| Cathartidae            | 5                 | 8         | Family         | COI, RAG-1, 12S, CYT-B, PER2                                                                      | <a href="https://doi.org/10.15468/dl.akpopk">https://doi.org/10.15468/dl.akpopk</a>                                                                                        |
| Cebidae                | 4                 | 41        | Family         | COII, COI, CYT-B, SRY, RAG-2, RAG-1, POLA-1, PNO, PLCB-4, BRCA-2, ADORA3, BDNF                    | <a href="https://doi.org/10.15468/dl.dlflps">https://doi.org/10.15468/dl.dlflps</a>                                                                                        |
| <i>Ceroxylon</i>       | 9                 | 13        | Genus          | ATPH-I, ATPH-F, NADH-F, PRK                                                                       | <a href="https://doi.org/10.15468/dl.ehuoxz">https://doi.org/10.15468/dl.ehuoxz</a><br><a href="https://doi.org/10.15468/dl.fbrdmp">https://doi.org/10.15468/dl.fbrdmp</a> |
| <i>Chiroderma</i>      | 3                 | 6         | Genus          | CYT-B, ATP-7A, RAG-2, BDNF, COI                                                                   | <a href="https://doi.org/10.15468/dl.dlflps">https://doi.org/10.15468/dl.dlflps</a>                                                                                        |
| <i>Chironius</i>       | 6                 | 18        | Genus          | CYT-B, 12S, 16S, C-MOS                                                                            | <a href="https://doi.org/10.15468/dl.7ftxu8">https://doi.org/10.15468/dl.7ftxu8</a>                                                                                        |
| <i>Chlorochrysa</i>    | 7                 | 13        | Genus          | CYT-B, NADH-2, COI, FGB-5, RAG-1                                                                  | <a href="https://doi.org/10.15468/dl.akpopk">https://doi.org/10.15468/dl.akpopk</a>                                                                                        |
| <i>Christensonella</i> | 2                 | 15        | Genus          | ITS-18S, TRNL-F, MATK, RCB-L                                                                      | <a href="https://doi.org/10.15468/dl.ehuoxz">https://doi.org/10.15468/dl.ehuoxz</a><br><a href="https://doi.org/10.15468/dl.fbrdmp">https://doi.org/10.15468/dl.fbrdmp</a> |
| <i>Chusquea</i>        | 29                | 79        | Genus          | NADH-F, ITS-18S, TRN-L, NADH-A, RPL-16, TRNQ                                                      | <a href="https://doi.org/10.15468/dl.ehuoxz">https://doi.org/10.15468/dl.ehuoxz</a><br><a href="https://doi.org/10.15468/dl.fbrdmp">https://doi.org/10.15468/dl.fbrdmp</a> |
| Ciconidae              | 2                 | 4         | Family         | CYT-B, COI, 12S, FG-17                                                                            | <a href="https://doi.org/10.15468/dl.akpopk">https://doi.org/10.15468/dl.akpopk</a>                                                                                        |
| Columnnea              | 58                | 85        | Genus          | PSB-A, ITS-18S, TRNQ, RPS16, MATK                                                                 | <a href="https://doi.org/10.15468/dl.ehuoxz">https://doi.org/10.15468/dl.ehuoxz</a><br><a href="https://doi.org/10.15468/dl.fbrdmp">https://doi.org/10.15468/dl.fbrdmp</a> |
| <i>Cyathea</i>         | 24                | 61        | Genus          | MATK, RBC-L, ATP-B, TRN-L                                                                         | <a href="https://doi.org/10.15468/dl.e3yepj">https://doi.org/10.15468/dl.e3yepj</a>                                                                                        |
| <i>Deltochilum</i>     | 3                 | 7         | Genus          | COI, 16S, 28S                                                                                     | <a href="https://doi.org/10.15468/dl.jl4awt">https://doi.org/10.15468/dl.jl4awt</a>                                                                                        |
| Dendrobatidae          | 33                | 104       | Family         | CYT-B, COI, RHO, RAG-1, 28S, BDNF, H-3                                                            | <a href="https://doi.org/10.15468/dl.wuwvew">https://doi.org/10.15468/dl.wuwvew</a>                                                                                        |
| Dendropicinni          | 12                | 56        | Tribe          | BF7, NADH-2, RAG-1, CYT-B, COI, MYO-I2, 12S                                                       | <a href="https://doi.org/10.15468/dl.akpopk">https://doi.org/10.15468/dl.akpopk</a>                                                                                        |
| Desmodontinae          | 3                 | 4         | Subfamily      | CYT-B, RAG-2, PLCB-4, ATP-7, BDNF, COI                                                            | <a href="https://doi.org/10.15468/dl.dlflps">https://doi.org/10.15468/dl.dlflps</a>                                                                                        |
| Didelphimorphia        | 29                | 80        | Order          | CYT-B, COI, NADH-2, VWF, IRBP, RAG-1, BRCA-1                                                      | <a href="https://doi.org/10.15468/dl.dlflps">https://doi.org/10.15468/dl.dlflps</a>                                                                                        |
| <i>Diplazium</i>       | 17                | 104       | Genus          | ATP-A, ATP-B, RBC-L, MATK, TRNL-F                                                                 | <a href="https://doi.org/10.15468/dl.zcyfwj">https://doi.org/10.15468/dl.zcyfwj</a>                                                                                        |
| <i>Dipsas</i>          | 6                 | 17        | Genus          | 12S, 16S, C-MOS, NADH-4, CYT-B, BDNF                                                              | <a href="https://doi.org/10.15468/dl.7ftxu8">https://doi.org/10.15468/dl.7ftxu8</a>                                                                                        |
| <i>Espeletia</i>       | 22                | 46        | Genus          | ITS-18S, ACC-D, MATK, ATP-B, RBC-L                                                                | <a href="https://doi.org/10.15468/dl.ehuoxz">https://doi.org/10.15468/dl.ehuoxz</a><br><a href="https://doi.org/10.15468/dl.fbrdmp">https://doi.org/10.15468/dl.fbrdmp</a> |
| Euglossini             | 38                | 85        | Tribe          | CYT-B, COI, EF-1A, ARG-K, POL-2                                                                   | <a href="https://doi.org/10.15468/dl.jl4awt">https://doi.org/10.15468/dl.jl4awt</a>                                                                                        |
| <i>Falco</i>           | 6                 | 34        | Genus          | RAG-1, CYT-B, PEPCK, COI                                                                          | <a href="https://doi.org/10.15468/dl.akpopk">https://doi.org/10.15468/dl.akpopk</a>                                                                                        |
| Felidae                | 7                 | 35        | Family         | ATP-A, COI, CYT-B, SRY, RAG-2, RAG-1, PNO, PLCB-4, BRCA-1, ADORA3, BDNF, 12S, 16S, NADH-2, NADH-5 | <a href="https://doi.org/10.15468/dl.dlflps">https://doi.org/10.15468/dl.dlflps</a>                                                                                        |
| <i>Fregata</i>         | 1                 | 6         | Genus          | CYT-B, COI, NADH-2, FG-17, 12S                                                                    | <a href="https://doi.org/10.15468/dl.akpopk">https://doi.org/10.15468/dl.akpopk</a>                                                                                        |

|                     |    |     |             |                                                                                         |                                                                                                                                                                            |
|---------------------|----|-----|-------------|-----------------------------------------------------------------------------------------|----------------------------------------------------------------------------------------------------------------------------------------------------------------------------|
| <i>Geonoma</i>      | 31 | 47  | Genus       | RPS16, RPB2, PRK, CISP-4, RBC-L                                                         | <a href="https://doi.org/10.15468/dl.ehuoxz">https://doi.org/10.15468/dl.ehuoxz</a><br><a href="https://doi.org/10.15468/dl.fbrdmp">https://doi.org/10.15468/dl.fbrdmp</a> |
| Glossophaginae      | 19 | 30  | Subfamily   | CYT-B, RAG-2, PLCB4, ATP-7, BDNF, COI                                                   | <a href="https://doi.org/10.15468/dl.dlflps">https://doi.org/10.15468/dl.dlflps</a>                                                                                        |
| <i>Ephedra</i>      | 4  | 56  | Genus       | MATK, ATP-B, RBC-L, ITS-18S, TRNL-F, COI                                                | <a href="https://doi.org/10.15468/dl.bu68de">https://doi.org/10.15468/dl.bu68de</a>                                                                                        |
| <i>Gonatodes</i>    | 8  | 18  | Genus       | 12S, 16S, C-MOS, RAG2                                                                   | <a href="https://doi.org/10.15468/dl.7ftxu8">https://doi.org/10.15468/dl.7ftxu8</a>                                                                                        |
| <i>Habenaria</i>    | 11 | 42  | Genus       | ITS-18S, MATK, TRN-K, RBC-L                                                             | <a href="https://doi.org/10.15468/dl.ehuoxz">https://doi.org/10.15468/dl.ehuoxz</a><br><a href="https://doi.org/10.15468/dl.fbrdmp">https://doi.org/10.15468/dl.fbrdmp</a> |
| <i>Heliconius</i>   | 22 | 43  | Genus       | COI-COII, EF-1A, WINGLESS, IDH, GAPDH, CAD                                              | <a href="https://doi.org/10.15468/dl.ji4awt">https://doi.org/10.15468/dl.ji4awt</a>                                                                                        |
| Hylidae             | 72 | 185 | Family      | 16S, RAG-1, CYT-B, POMC, 12S, COI                                                       | <a href="https://doi.org/10.15468/dl.zuuty7">https://doi.org/10.15468/dl.zuuty7</a>                                                                                        |
| <i>Kinosternon</i>  | 3  | 18  | Genus       | COI, CYT-B, C-MOS, 16S, RAG-1                                                           | <a href="https://doi.org/10.15468/dl.7ftxu8">https://doi.org/10.15468/dl.7ftxu8</a>                                                                                        |
| <i>Leptodeira</i>   | 8  | 18  | Genus       | NADH-4, C-MOS, CYT-B, 16S, 12S                                                          | <a href="https://doi.org/10.15468/dl.7ftxu8">https://doi.org/10.15468/dl.7ftxu8</a>                                                                                        |
| <i>Lupinus</i>      | 16 | 72  | Genus       | ITS-18S, TRNL-F, GLYCEROL3, MATK, RBC-L                                                 | <a href="https://doi.org/10.15468/dl.ehuoxz">https://doi.org/10.15468/dl.ehuoxz</a><br><a href="https://doi.org/10.15468/dl.fbrdmp">https://doi.org/10.15468/dl.fbrdmp</a> |
| Lutrinae            | 2  | 14  | Subfamily   | CYT-B, RAG-1, RAG-2, BRCA-1, BDNF, RHO                                                  | <a href="https://doi.org/10.15468/dl.dlflps">https://doi.org/10.15468/dl.dlflps</a>                                                                                        |
| Lycopodiaceae       | 25 | 86  | Family      | RBC-L, PSB-A, TRNL                                                                      | <a href="https://doi.org/10.15468/dl.zn79t3">https://doi.org/10.15468/dl.zn79t3</a>                                                                                        |
| <i>Macleania</i>    | 8  | 9   | Genus       | MATK, ITS-18S, NADH-F                                                                   | <a href="https://doi.org/10.15468/dl.ehuoxz">https://doi.org/10.15468/dl.ehuoxz</a><br><a href="https://doi.org/10.15468/dl.fbrdmp">https://doi.org/10.15468/dl.fbrdmp</a> |
| Trochilidae         | 11 | 21  | Family      | ODC, CYT-B, NADH-2, COI, BFIB                                                           | <a href="https://doi.org/10.15468/dl.akpopk">https://doi.org/10.15468/dl.akpopk</a>                                                                                        |
| <i>Mastigodryas</i> | 4  | 7   | Genus       | CYT-B, 12S, 16S, C-MOS                                                                  | <a href="https://doi.org/10.15468/dl.7ftxu8">https://doi.org/10.15468/dl.7ftxu8</a>                                                                                        |
| <i>Maxillaria</i>   | 31 | 52  | Genus       | ITS-18S, MATK, ATP-B, RPO-C1                                                            | <a href="https://doi.org/10.15468/dl.ehuoxz">https://doi.org/10.15468/dl.ehuoxz</a><br><a href="https://doi.org/10.15468/dl.fbrdmp">https://doi.org/10.15468/dl.fbrdmp</a> |
| <i>Megascops</i>    | 8  | 22  | Genus       | COI, RAG-1, CYT-B, MUSK, FGB, NADH2                                                     | <a href="https://doi.org/10.15468/dl.akpopk">https://doi.org/10.15468/dl.akpopk</a>                                                                                        |
| <i>Melocactus</i>   | 1  | 5   | Genus       | MATK, PHOCAR, RPL16, TRNF-L                                                             | <a href="https://doi.org/10.15468/dl.ehuoxz">https://doi.org/10.15468/dl.ehuoxz</a><br><a href="https://doi.org/10.15468/dl.fbrdmp">https://doi.org/10.15468/dl.fbrdmp</a> |
| Mephitidae          | 1  | 10  | Family      | COI, CYT-B, FES, APOB, GHR, RHO1, RHO2, NADH2, CHRNA-1, ATP-7, APP, ADORA3, PNOC, RAG-2 | <a href="https://doi.org/10.15468/dl.dlflps">https://doi.org/10.15468/dl.dlflps</a>                                                                                        |
| <i>Metallura</i>    | 5  | 15  | Genus       | ODC, CYT-B, NADH-2, COI, FGB                                                            | <a href="https://doi.org/10.15468/dl.akpopk">https://doi.org/10.15468/dl.akpopk</a>                                                                                        |
| <i>Micrathena</i>   | 3  | 22  | Genus       | COI, 16S, ITS-18S                                                                       | <a href="https://doi.org/10.15468/dl.kk65e9">https://doi.org/10.15468/dl.kk65e9</a>                                                                                        |
| <i>Micrurus</i>     | 9  | 27  | Genus       | ITS-18S, CYTB, C-MOS                                                                    | <a href="https://doi.org/10.15468/dl.7ftxu8">https://doi.org/10.15468/dl.7ftxu8</a>                                                                                        |
| Momotidae           | 5  | 7   | Family      | CYT-B, NADH-2, COI, FB-17                                                               | <a href="https://doi.org/10.15468/dl.akpopk">https://doi.org/10.15468/dl.akpopk</a>                                                                                        |
| Mormoopidae         | 5  | 9   | Family      | COI, CYT-B, APOB, NADH-2, RAG-2, PLCB4, BDNF                                            | <a href="https://doi.org/10.15468/dl.dlflps">https://doi.org/10.15468/dl.dlflps</a>                                                                                        |
| <i>Morpho</i>       | 10 | 31  | Genus       | COI, CYT-B, CAD, RPS-5, GAPDH, MDH, EF-1A                                               | <a href="https://doi.org/10.15468/dl.ji4awt">https://doi.org/10.15468/dl.ji4awt</a>                                                                                        |
| Mustelinae          | 3  | 36  | Subfamily   | CYT-B, RAG-1, RAG-2, BRCA-1, BDNF, RHO                                                  | <a href="https://doi.org/10.15468/dl.dlflps">https://doi.org/10.15468/dl.dlflps</a>                                                                                        |
| <i>Napeogenes</i>   | 9  | 22  | Genus       | EF-1A, TEKTIN, COI-COII                                                                 | <a href="https://doi.org/10.15468/dl.ji4awt">https://doi.org/10.15468/dl.ji4awt</a>                                                                                        |
| Natalidae           | 3  | 8   | Family      | COI, RAG-2, CYT-B                                                                       | <a href="https://doi.org/10.15468/dl.dlflps">https://doi.org/10.15468/dl.dlflps</a>                                                                                        |
| Noctilionoidea      | 5  | 7   | Superfamily | COI, PLCB-4, RAG-2, BDNF, PNOC                                                          | <a href="https://doi.org/10.15468/dl.dlflps">https://doi.org/10.15468/dl.dlflps</a>                                                                                        |
| <i>Opuntia</i>      | 9  | 100 | Genus       | RBC-L, MATK, ATP-B                                                                      | <a href="https://doi.org/10.15468/dl.ehuoxz">https://doi.org/10.15468/dl.ehuoxz</a><br><a href="https://doi.org/10.15468/dl.fbrdmp">https://doi.org/10.15468/dl.fbrdmp</a> |
| <i>Ortalis</i>      | 4  | 10  | Genus       | CYT-B, 12S, FB-17, NADH-2, RAG-1, RAG-2, COI                                            | <a href="https://doi.org/10.15468/dl.akpopk">https://doi.org/10.15468/dl.akpopk</a>                                                                                        |
| <i>Pereskia</i>     | 1  | 10  | Genus       | RBC-L, TRNK, RPL16, COIII, PSB-A                                                        | <a href="https://doi.org/10.15468/dl.ehuoxz">https://doi.org/10.15468/dl.ehuoxz</a><br><a href="https://doi.org/10.15468/dl.fbrdmp">https://doi.org/10.15468/dl.fbrdmp</a> |
| Phyllostominae      | 21 | 43  | Subfamily   | CYT-B, RAG-2, PLCB-4, ATP-7, BDNF, COI, THY, ITS-18S                                    | <a href="https://doi.org/10.15468/dl.dlflps">https://doi.org/10.15468/dl.dlflps</a>                                                                                        |
| <i>Piper</i>        | 51 | 103 | Genus       | ITS-18S, PSB-A, NADH-F, TRNL-F, TRN-H, MATK, RBC-L                                      | <a href="https://doi.org/10.15468/dl.ehuoxz">https://doi.org/10.15468/dl.ehuoxz</a><br><a href="https://doi.org/10.15468/dl.fbrdmp">https://doi.org/10.15468/dl.fbrdmp</a> |
| Pitheciidae         | 3  | 27  | Family      | COII, COI, CYT-B, SRY, RAG-2, POLA1, PNOC, PLCB-4, BRCA-2, ADORA3, BDNF                 | <a href="https://doi.org/10.15468/dl.dlflps">https://doi.org/10.15468/dl.dlflps</a>                                                                                        |
| <i>Platyrrhinus</i> | 13 | 17  | Genus       | CYT-B, RAG-2, PLCB-4, ATP-7, BDNF, COI, THY, ITS-18S, NADH-2                            | <a href="https://doi.org/10.15468/dl.dlflps">https://doi.org/10.15468/dl.dlflps</a>                                                                                        |
| <i>Podiceps</i>     | 3  | 10  | Genus       | NADH-2, COI, RAG-1                                                                      | <a href="https://doi.org/10.15468/dl.akpopk">https://doi.org/10.15468/dl.akpopk</a>                                                                                        |
| <i>Pristimantis</i> | 79 | 123 | Genus       | COI, 12S, 16S, RAG-1, TYR                                                               | <a href="https://doi.org/10.15468/dl.6qs5tr">https://doi.org/10.15468/dl.6qs5tr</a>                                                                                        |
| Procyonidae         | 9  | 13  | Family      | CYT-B, COI, RAG-2, BDNF, RAG-1, ATP-7, ADORA3, NADH-5, NADH-2, 12S                      | <a href="https://doi.org/10.15468/dl.dlflps">https://doi.org/10.15468/dl.dlflps</a>                                                                                        |
| Ramphastidae        | 20 | 35  | Family      | CYT-B, NADH-2, COI, FG-17                                                               | <a href="https://doi.org/10.15468/dl.akpopk">https://doi.org/10.15468/dl.akpopk</a>                                                                                        |
| <i>Sphagnum</i>     | 32 | 161 | Genus       | TRNG, RBC-L, MATK, ITS-18S, RPL16, TRNL, ILY                                            | <a href="https://doi.org/10.15468/dl.bbhttc">https://doi.org/10.15468/dl.bbhttc</a>                                                                                        |
| <i>Sturnira</i>     | 10 | 13  | Genus       | CYT-B, RAG-2, RAG-1, NADH-2, COI                                                        | <a href="https://doi.org/10.15468/dl.dlflps">https://doi.org/10.15468/dl.dlflps</a>                                                                                        |
| <i>Tangara</i>      | 32 | 51  | Genus       | CYT-B, NADH-2, COI, FG-15, RAG-1                                                        | <a href="https://doi.org/10.15468/dl.akpopk">https://doi.org/10.15468/dl.akpopk</a>                                                                                        |
| Tinaminae           | 3  | 6   | Subfamily   | COI, BDNF, CYT-B                                                                        | <a href="https://doi.org/10.15468/dl.akpopk">https://doi.org/10.15468/dl.akpopk</a>                                                                                        |
| Trogonidae          | 14 | 17  | Family      | BF-7, NADH-2, RAG-1, CYT-B, COI, MYO-I2                                                 | <a href="https://doi.org/10.15468/dl.akpopk">https://doi.org/10.15468/dl.akpopk</a>                                                                                        |

|                   |    |    |        |                                                             |                                                                                     |
|-------------------|----|----|--------|-------------------------------------------------------------|-------------------------------------------------------------------------------------|
| Ursidae           | 1  | 9  | Family | ATP-12, COI, CYT-B, SRY, 12S, 16S, NADH-2, ZFY              | <a href="https://doi.org/10.15468/dl.dlffps">https://doi.org/10.15468/dl.dlffps</a> |
| <i>Vampyressa</i> | 4  | 8  | Genus  | CYT-B, RAG-2, PLCB-4, ATP-7, BDNF, COI, THY, ITS-18, NADH-2 | <a href="https://doi.org/10.15468/dl.dlffps">https://doi.org/10.15468/dl.dlffps</a> |
| Viperidae         | 13 | 90 | Family | CYT-B, NADH-4, 12S, 16S                                     | <a href="https://doi.org/10.15468/dl.7ftxu8">https://doi.org/10.15468/dl.7ftxu8</a> |
| <i>Xylocopa</i>   | 2  | 16 | Genus  | CYT-B, PEPCL, COI, EF-1A, 18S, 28S                          | <a href="https://doi.org/10.15468/dl.jl4awt">https://doi.org/10.15468/dl.jl4awt</a> |
| <i>Zamia</i>      | 11 | 25 | Genus  | ITS-18S, ATP-B, ATP-F, TRNL, PHYF                           | <a href="https://doi.org/10.15468/dl.88hq9p">https://doi.org/10.15468/dl.88hq9p</a> |
