# Supplementary material for: Phylogenetic diversity and North Andean block conservation
Source: PeerJ journal article supplement (doi:10.7717/peerj.16565), 2023-12-06
Supplement: Supplementary_Table_S3.pdf [file Supplementary_Table_S3.pdf]

| No of Phylogenies | Mean probability of classification success (p/N) |      |      |      |      |
|-------------------|--------------------------------------------------|------|------|------|------|
|                   | Q1                                               | Q2   | Q3   | Q4   | Q5   |
| 23                | 0.76                                             | 0.42 | 0.37 | 0.37 | 0.41 |
| 46                | 0.88                                             | 0.63 | 0.63 | 0.63 | 0.69 |
| 69                | 0.93                                             | 0.80 | 0.81 | 0.89 | 0.97 |
